1  
2 **Catching the big picture of the Mediterranean Sea biodiversity**  
3 **with an end-to-end model of climate and fishing impacts**

4  
5 **Fabien Moullec<sup>a\*</sup>, Laure Velez<sup>a</sup>, Philippe Verley<sup>b</sup>, Nicolas Barrier<sup>c</sup>, Caroline Ulses<sup>d</sup>, Pierluigi**  
6 **Carbonara<sup>e</sup>, Antonio Esteban<sup>f</sup>, Cristina Follesa<sup>g</sup>, Michele Gristina<sup>h</sup>, Angélique Jadaud<sup>c</sup>,**  
7 **Alessandro Ligas<sup>i</sup>, Eduardo López Díaz<sup>j</sup>, Porzia Maiorano<sup>k</sup>, Panagiota Peristeraki<sup>l,m</sup>, Maria**  
8 **Teresa Spedicato<sup>e</sup>, Ioannis Thasitis<sup>n</sup>, Maria Valls<sup>o</sup>, François Guilhaumon<sup>a</sup> and Yunne-Jai**  
9 **Shin<sup>a,p</sup>**

10 <sup>(a)</sup> MARBEC, Université de Montpellier, IRD, CNRS, Ifremer, Montpellier, France

11 <sup>(b)</sup> IRD, CIRAD, UMR AMAP, Boulevard de la Lironde, 34398 Montpellier Cedex 5, France

12 <sup>(c)</sup> MARBEC, Université de Montpellier, IRD, CNRS, Ifremer, Sète, France

13 <sup>(d)</sup> Laboratoire d'Aérodynamique, Université de Toulouse, CNRS, UPS, Toulouse, France

14 <sup>(e)</sup> COISPA Tecnologia and Ricerca, Stazione Sperimentale per lo Studio delle Risorse del Mare, Bari,  
15 Italy

16 <sup>(f)</sup> Instituto Español de Oceanografía (IEO), Centro Oceanográfico de Murcia, Murcia, Spain

17 <sup>(g)</sup> Dipartimento di Biologia Animale ed Ecologia, Università di Cagliari, Cagliari, Italy

18 <sup>(h)</sup> Institute for the Coastal Marine Environment (CNR), Mazara del Vallo, Italy

19 <sup>(i)</sup> Consorzio per il Centro Interuniversitario di Biologia Marina ed Ecologia Applicata 'G. Bacci', viale N.  
20 Sauro 4, I-57128 Livorno, Italy

21 <sup>(j)</sup> Instituto Español de Oceanografía (IEO), Centro Oceanográfico de Málaga, Fuengirola, Málaga, Spain

22 <sup>(k)</sup> Department of Biology, University of Bari, Bari, Italy

23 <sup>(l)</sup> Hellenic Center for Marine Research, Iraklion, Crete, Greece

24 <sup>(m)</sup> University of Crete, Biology Department, Stavrakia, Heraklion, Crete

25 <sup>(n)</sup> Department of Fisheries and Marine Research, Ministry of Agriculture, Natural Resources and  
26 Environment, Nicosia, Cyprus

27 <sup>(o)</sup> Instituto Español de Oceanografía (IEO), Centre Oceanogràfic de les Balears s/n, 07015 Palma, Spain

28 <sup>(p)</sup> Marine Research (MA-RE) Institute and Department of Biological Sciences, University of Cape Town,  
29 Private Bag X3, Rondebosch 7701, South Africa

30  
31 \*Corresponding author, E-mail: [fabien.moullec@ird.fr](mailto:fabien.moullec@ird.fr)  
32 E-mail addresses: [laure.velez@umontpellier.fr](mailto:laure.velez@umontpellier.fr) (L. Velez), [philippe.verley@ird.fr](mailto:philippe.verley@ird.fr) (P. Verley),  
33 [nicolas.barrier@ird.fr](mailto:nicolas.barrier@ird.fr) (N. Barrier), [caroline.ulsesh@aero.obs-mip.fr](mailto:caroline.ulsesh@aero.obs-mip.fr) (C. Ulses), [carbonara@coispa.it](mailto:carbonara@coispa.it) (P.  
34 Carbonara), [antonio.esteban@ieo.es](mailto:antonio.esteban@ieo.es) (A. Esteban), [follesac@unica.it](mailto:follesac@unica.it) (C. Follesa),  
35 [michele.gristina@iamc.cnr.it](mailto:michele.gristina@iamc.cnr.it) (M. Gristina), [angelique.jadaud@ifremer.fr](mailto:angelique.jadaud@ifremer.fr) (A. Jadaud), [ligas@cibm.it](mailto:ligas@cibm.it) (A.

36 Ligas), [eduardo.lopez@ieo.es](mailto:eduardo.lopez@ieo.es) (E. López Díaz), [porzia.maiorano@uniba.it](mailto:porzia.maiorano@uniba.it) (P. Maiorano),  
37 [notap@her.hcmr.gr](mailto:notap@her.hcmr.gr) (P. Peristeraki), [spedicato@coispa.it](mailto:spedicato@coispa.it) (M.T. Spedicato), [ithasitis@dfmr.moa.gov.cy](mailto:ithasitis@dfmr.moa.gov.cy) (I.  
38 Thasitis), [maria.valls@ieo.es](mailto:maria.valls@ieo.es) (M. Valls), [francois.guilhaumon@ird.fr](mailto:francois.guilhaumon@ird.fr) (F. Guilhaumon), [yunne-jai.shin@ird.fr](mailto:yunne-jai.shin@ird.fr)  
39 (Y.J. Shin)

40

## 41 **Abstract**

42 The Mediterranean Sea is among the main hotspots of marine biodiversity in the world. Under  
43 combined pressures of fishing activities and climate change it has also become a hotspot of global  
44 change, with increased concern about the worsening status of marine exploited species. More  
45 integrated modelling approaches are needed to anticipate global change impacts in the  
46 Mediterranean Sea, in order to help decision makers prioritizing management actions and  
47 strategies, mitigating impacts and adapting to changes. Our challenge was to develop a holistic  
48 model of the marine biodiversity in the Mediterranean Sea with an explicit representation of the  
49 spatial multispecies dynamics of exploited resources under the combined influence of climate  
50 variability and fishing pressure. An individual-based ecosystem model OSMOSE (Object-oriented  
51 Simulator of Marine ecOSystEms), including 100 marine species (fish, cephalopods and  
52 crustaceans) and representing about 95 % of the total declared catches, has been implemented  
53 for the first time at a high spatial resolution (400 km<sup>2</sup>) and at a large spatial scale (whole  
54 Mediterranean basin). The coupling of OSMOSE to the NEMOMED 12 physical model, and to the  
55 Eco3M-S biogeochemical and low trophic level model has been achieved to build the OSMOSE-  
56 MED end-to-end model. We fitted OSMOSE-MED to observed and estimated data of biomass and  
57 commercial catches using a likelihood approach and an evolutionary optimization algorithm. The  
58 outputs of OSMOSE-MED were then verified against observed biomass and catches, and  
59 confronted to independent datasets (MEDITS data, diet compositions and trophic levels). Although  
60 some improvements are suggested for future developments, the model results at different  
61 hierarchical levels, from individuals up to the ecosystem scale, were consistent with current  
62 knowledge and observations on the structure, the functioning and the dynamics of the ecosystems  
63 in the Mediterranean Sea. All the modelling steps, from the comprehensive representation of key  
64 ecological processes and feedbacks, the careful parameterization of the model, the confrontation  
65 to observed data, and the positive outcome from the validation process, allowed to strengthen the  
66 degree of realism of OSMOSE-MED and its relevance as an impact model to explore the futures  
67 of marine biodiversity under scenarios of global change, and as a tool to support the  
68 implementation of ecosystem-based fisheries management in the Mediterranean Sea.

69 **Keywords:** Ecosystem model, Ecosystem Approach to Fisheries Management, OSMOSE model,  
70 NEMOMED model, Eco3M-S model, Global change  
71

## 72 **1 Introduction**

73 The Mediterranean Sea is the largest of the semi-enclosed European seas and one of the main  
74 reservoirs of biodiversity in the world (Coll et al., 2010). It embeds 4 to 18% of identified marine  
75 species which is considerable given it only covers 0.82% of the global ocean surface (Coll et al.,  
76 2010). The Mediterranean Sea is also a hotspot of global changes (Coll et al., 2012, 2010; Giorgi,  
77 2006; Giorgi and Lionello, 2008; Micheli et al., 2013a; Ramírez et al., 2018; Stock et al., 2018).  
78 Overfishing, pollutions from land-based sources, degradation or loss of critical habitats, species  
79 introductions and climate change are all pervasive in the Mediterranean Sea and may operate in  
80 synergy, leading to deep modifications of the structure, stability and functioning of marine  
81 Mediterranean ecosystems (Albouy et al., 2014; Coll et al., 2012; Lotze et al., 2006). Fishing is  
82 probably one of the highest threat for biodiversity in the region : Exploitation rate has been steadily  
83 and steeply increasing with poor fishing selectivity, and fish stocks have been shrinking (Colloca  
84 et al., 2017; Vasilakopoulos et al., 2014). As a consequence, more than 90 % of the assessed  
85 stocks were categorized as overfished in 2017 (GFCM, 2017a; STECF, 2017). Nonetheless, while  
86 fish stocks are declining on the continental shelf, especially those of long-living species such as  
87 European hake (*Merluccius merluccius*), a few short-living species such as shrimps, cephalopods,  
88 and other fish species (e.g., red mullet, *Mullus barbatus*), have shown increasing trends in  
89 biomass (GFCM, 2017a; Maynou et al., 2011). Deep-water rose shrimp, *Parapenaeus longirostris*,  
90 is the most emblematic example: its biomass has increased all over the Mediterranean Sea in the  
91 last decade due to increasing temperature and decrease of predatory pressure (i.e. by European  
92 hake) (Colloca et al., 2014; Ligas et al., 2011; Sbrana et al., in press).

93 In the absence (or lack) of strong management plans, the deteriorating status of fisheries and their  
94 resources in the Mediterranean Sea is likely to aggravate, especially in a climate change context  
95 (Cheung et al., 2018; FAO, 2018). The Mediterranean Sea has been identified as one of the most  
96 vulnerable regions in future climate change projections (Cramer et al., 2018; Giorgi, 2006; Hoegh-  
97 Guldborg et al., 2014). Effects of climate change on marine ecosystems are already clearly  
98 perceivable, with impacts reported from low (e.g. macrophytes, phytoplankton) to high (e.g.  
99 predatory fish) trophic levels, from individual up to the ecosystem scale (Calvo et al., 2011; Durrieu  
100 de Madron et al., 2011; Lejeune et al., 2010; Marbà et al., 2015; Tzanatos et al., 2014) which  
101 could affect biodiversity, commercial fisheries, food web and ecosystem functioning (Albouy et al.,

102 2014; AllEnvi, 2016; Bosello et al., 2015; Hattab et al., 2014; Jordà et al., 2012; Marbà et al., 2015;  
103 Pecl et al., 2017; Piroddi et al., 2017).

104 Anthropogenic pressures on Mediterranean ecosystems are projected to increase in the future,  
105 especially those related to climate change, habitat degradation and exploitation (Butchart et al.,  
106 2010; Calvo et al., 2011; Coll et al., 2010). Considering the diversity of human and natural  
107 pressures and the possibility that they act in synergy on marine ecosystems, there is an urgent  
108 need for scientists and decision-makers to develop more holistic and integrative approaches to  
109 quantify, anticipate, mitigate and manage human impacts on natural environments (Colloca et al.,  
110 2017; Hilborn, 2011; Link, 2010). Along these lines, Ecosystem-Based Management (EBM) and  
111 more specifically the Ecosystem Approach to Fisheries Management (EAFM) emerged in the early  
112 1990s to consider all anthropogenic activities which could affect the sustainability of goods and  
113 services provided by ecosystems (Pikitch et al., 2004). In the European Union seas, these  
114 approaches are mainly framed by the Common Fisheries Policy (CFP, 2013), and the European  
115 Marine Strategy Framework Directive (MSFD; European Commission, 2008) that requires that all  
116 member states take the necessary measures to achieve or maintain Good Environmental Status  
117 for marine ecosystems, with the explicit regulatory objective that “biodiversity is maintained” by  
118 2020 at the latest (European Commission, 2008). The MSFD thereby requires the development  
119 of suitable tools to evaluate the status of marine ecosystems and their responses to human  
120 activities, and to manage and harvest sustainably all commercial species. In this regard, it is  
121 essential to develop our capacities in projecting the future impacts of a variety of policy  
122 interventions and strategic management plans for restoring marine ecosystems and biodiversity  
123 while ensuring sustained provision of marine fisheries products to human societies.

124 In order to propose plausible biodiversity scenarios at the scale of the whole Mediterranean Sea,  
125 which would relevantly support management decision in the region, the challenge that is  
126 addressed in this paper is to develop a model able to represent in an explicit way the spatial  
127 multispecies dynamics of marine resources under the combined influence of climate change and  
128 fishing pressure. The most recent End-to-End models (E2E), representing the entire food web,  
129 from plankton to top predators as well as their associated abiotic environment, are expected to  
130 provide valuable tools for assessing the effects of climate and fishing on ecosystem dynamics  
131 (Fulton, 2010; Grimm et al., 2017; Nicholson et al., 2018; Piroddi et al., 2017, 2015b; Rose et al.,  
132 2010; Travers et al., 2007). Notwithstanding the state-of-the-art modelling of food webs and  
133 multispecies communities in Mediterranean ecosystems, there is still a gap in modelling the  
134 dynamics of biodiversity at the scale of the whole Mediterranean Sea, accounting for the  
135 complexity of species introductions, multispecies interactions and spatial dynamics in a global

136 change context. While trophic modelling has improved greatly on coastal marine ecosystems in  
137 different parts of the Mediterranean Sea, no study has yet succeeded to model species  
138 assemblages at the whole Mediterranean scale with an explicit modelling of the multispecies,  
139 spatial, trait-based, whole life cycle dynamics and interactions of a hundred exploited species.  
140 In this paper, we present the individual-based, ecosystem model OSMOSE (Object-oriented  
141 Simulator of Marine ecOSystEms) that was used for the first time at large spatial scale (the whole  
142 Mediterranean basin), with a high spatial resolution (400 km<sup>2</sup>), and for as many as 100 marine  
143 species (fish, cephalopods and crustaceans) representing about 95 % of total declared catches in  
144 the Mediterranean Sea. We built an end-to-end modelling approach of the Mediterranean Sea by  
145 coupling the OSMOSE model (representing the higher trophic level species) to the physical model  
146 NEMOMED 12, and to the biogeochemical model Eco3M-S (representing the low trophic levels).  
147 The resulting end-to-end model OSMOSE-MED was calibrated to represent the Mediterranean  
148 Sea during the 2006-2013 period. Here, we: (i) start with a brief description of the NEMOMED 12,  
149 Eco3M-S and OSMOSE component models; (ii) detail the parameterization of OSMOSE-MED;  
150 (iii) present the methodology implemented to calibrate OSMOSE-MED; (iv) evaluate the capacity  
151 of OSMOSE-MED to represent some key indicators of the Mediterranean Sea, namely biomass,  
152 catches, trophic levels, at the individual up to the community scales; (v) discuss the challenges  
153 incurred by the development of such complex end-to-end models as well as associated limitations.

## 154 **2 Materials and Methods**

155 The individual-based model OSMOSE considers a large proportion of the fishable food web and  
156 simulates trophic interactions between several target and non-target marine species, mainly fish  
157 species. In order to model the effects of environmental heterogeneity and variability which could  
158 affect the entire food web by bottom-up control, OSMOSE has been forced (i.e. one way coupling  
159 – offline) by the Low Trophic Levels (LTL) NEMOMED 12 / Eco3M-S model. The end-to-end  
160 OSMOSE-MED model thus formed represents the whole food web from primary and secondary  
161 producers to main top predators.

### 162 **2.1 The low trophic levels model NEMOMED 12 / Eco3M-S**

163 Eco3M-S is a biogeochemical model that simulates the lower trophic levels of marine ecosystems  
164 (phyto- and zoo-plankton), the biogeochemical cycles of carbon and other key elements such as  
165 phosphorus and nitrogen in the Mediterranean Sea (Auger et al., 2011; Ulses et al., 2016).  
166 Independently from our study, Eco3M-S has been coupled to NEMOMED12, a high resolution  
167 ( $\approx 1/12^\circ$ ) hydro-dynamical model adapted to the Mediterranean region (see Beuvier et al., 2012 for

168 more details on the structure and parameterization of NEMOMED 12) (Kessouri, 2015; Kessouri  
169 et al., 2017).

170 NEMOMED12 is a regional circulation model, which is an updated version of the OPAMED 8 and  
171 NEMOMED 8 models used by Ben Rais Lasram et al. (2010), Hattab et al. (2014), Albouy et al.  
172 (2014, 2013, 2012) and more recently by Halouani et al. (2016) as input for niche/habitat models  
173 at local or regional scale in the Mediterranean Sea. The NEMOMED 12 domain covers the whole  
174 Mediterranean Sea and part of the Atlantic Ocean (from 11 °W to 7.5 °W) to take into account the  
175 inter-oceans exchanges (Beuvier et al., 2012a; Beuvier et al., 2012b). It does not cover the Black  
176 Sea. Based on the standard three-polar ORCA grid of NEMO at 1/12° (≈7 km), NEMOMED 12  
177 resolution varies in latitude and longitude but allows to explicitly resolve most of the mesoscale  
178 features. NEMOMED 12 is thus an eddy-resolving model in the major part of the Mediterranean  
179 Sea (Beuvier et al., 2012a). It has a time step of 12 minutes, and is daily forced by the atmospheric  
180 ARPERA data, obtained by performing a dynamical downscaling of ECMWF (European Centre  
181 for Medium-Range Weather Forecasts) products above the European-Mediterranean region  
182 (Beuvier et al., 2012a; Herrmann and Somot, 2008).

183 The coupling between NEMOMED 12 and the biogeochemical Eco3M-S model was done offline  
184 (one way coupling). The Eco3M-S model represents several elements' cycles such as carbon (C),  
185 nitrogen (N), phosphorus (P) and silica (Si) in order to reproduce the different limitations and co-  
186 limitations observed in the Mediterranean Sea and the dynamics of different plankton groups.  
187 Seven planktonic functional types (PFTs) representing the main PFTs and the range of the  
188 plankton size spectrum of the Mediterranean Sea were modelled. Thus, the structure of the trophic  
189 web base includes three size-classes of phytoplankton (pico-, nano-, and micro-phytoplankton),  
190 three size-classes of zooplankton (nano-, micro-, and meso-zooplankton), and heterotrophic  
191 bacteria as decomposers (Table 1). The representation of the phytoplankton dynamics was  
192 derived from the Eco3M model presented in Baklouti et al. (2006). Among primary producers,  
193 nanophytoplankton dominated the biomass of phytoplankton communities for most of the year,  
194 and microphytoplankton could punctually contribute to a large part of primary production during  
195 the spring period in the Northwestern Mediterranean Sea (Auger et al., 2011; Ulses et al., 2016).  
196 The structure of Eco3M-S reflects major grazing links such as nanozooplankton preying on the  
197 small phytoplankton group and bacteria, microzooplankton consuming microphytoplankton, and  
198 mesozooplankton, mainly composed by copepods, grazing on the largest categories of plankton  
199 (i.e. microphyto- and microzoo-plankton). Bacteria (i.e. picoheterotroph plankton) are responsible  
200 for the remineralization of the dissolved organic matter. The representation of the heterotrophic  
201 processes is based on the models developed by Anderson and Pondaven (2003) and Raick et al.

202 (2005). All features, formulations and parameterization of biogeochemical processes integrated in  
 203 the mechanistic Eco3M-S model were described in details by Auger et al. (2011), Kessouri (2015)  
 204 and Ulses et al. (2016).

205 *Table 1 Parameters of the seven low trophic level compartments used to build the trophic links with OSMOSE. Other*  
 206 *parameters used to run ECO3M-S are documented in Auger et al. (2011), Ulses et al., (2016) and Kessouri et al.,*  
 207 *(2017).*

| Main Plankton              |                                                                                   |                               |                               |                  |
|----------------------------|-----------------------------------------------------------------------------------|-------------------------------|-------------------------------|------------------|
| Functional Types<br>(PFTs) | Main species / groups                                                             | Min size<br>( $\mu\text{m}$ ) | Max size<br>( $\mu\text{m}$ ) | Trophic<br>level |
| Picophytoplankton          | <i>Synechococcus spp.</i>                                                         | 0.7                           | 2                             | 1                |
| Nanophytoplankton          | Dinoflagellates                                                                   | 2                             | 20                            | 1                |
| Microphytoplankton         | Diatoms                                                                           | 20                            | 200                           | 1                |
| Nanozooplankton            | Bacterivorous flagellates and small ciliates                                      | 5                             | 20                            | 2                |
| Microzooplankton           | Ciliates and large flagellates                                                    | 20                            | 200                           | 2                |
| Mesozooplankton            | Copepods and amphipods                                                            | 200                           | -                             | 2                |
| Benthos <sup>a</sup>       | Based on benthos groups included in the<br>Ecopath model of Piroddi et al. (2017) | 2000                          | 50000                         | 2.4              |

208 <sup>a</sup>Benthos is considered as a LTL group but is not an output of the Eco3M-S model. This group is included as a black-  
 209 box in the HTL model OSMOSE.

## 210 **2.2 The high trophic levels model OSMOSE**

211 The OSMOSE model has been applied in different ecosystem types such as upwelling  
 212 ecosystems (Southern Benguela and Humboldt), temperate ones (West Coast Canada, Jiaozhou  
 213 Bay), Mediterranean ones (Gulf of Gabes, Gulf of Lions) or subtropical ones (West Florida shelf)  
 214 in order to assess the impacts of both fishing and climate change scenarios on marine food web  
 215 functioning and species resilience (Fu et al., 2013; Grüss et al., 2015; Halouani et al., 2016;  
 216 Marzloff et al., 2009; Travers et al., 2009; Xing et al., 2017). OSMOSE is a size-based trophic  
 217 model that focuses on high trophic levels, mainly fish species. This multispecies and individual-  
 218 based model is spatially explicit and represents the whole life cycle of several interacting marine  
 219 species. From eggs to adult fish, major processes of the life cycle, i.e. growth, predation,  
 220 reproduction, natural and starvation mortalities as well as fishing mortality are modeled step by  
 221 step. Under computational time and memory constraints, rather than being truly individual-based,  
 222 OSMOSE is based on "super-individuals", as proxies for fish schools, defined as group of  
 223 individuals sharing the same age, length, diet and spatial position and interacting with other  
 224 schools in a two-dimensional grid. Species interact through predation in a spatial and dynamic  
 225 way (Shin and Cury, 2004). The model is forced by species-specific spatial distribution maps which  
 226 can vary interannually, seasonally, or depending on ontogenetic stages. OSMOSE allows the  
 227 emergence of complex trophic interactions from two basic assumptions on predation process: for

228 a given individual (a school), prey consumption depends on the spatio-temporal co-occurrence of  
229 the predator and its prey (in the horizontal and vertical dimensions) and is conditioned by size  
230 compatibility between a predator and its prey. Thus, unlike other trophic models such as Ecopath  
231 with Ecosim (Christensen and Walters, 2004), species dynamics and trophic structures are not  
232 modelled from pre-established trophic interactions between species: each fish can potentially be  
233 a predator or a prey, regardless of its taxonomy, but depending on size compatibility between a  
234 predator and its prey (Shin et al., 2004; Shin and Cury, 2001). A maximum and a minimum  
235 predator/prey size ratio are thus defined to rule predator prey interactions (Travers et al., 2009).  
236 To integrate a vertical dimension in the food web, accessibility coefficients are defined in the form  
237 of a prey-predator accessibility matrix that reflects possible mismatches or overlap between  
238 species vertical distributions and/or potential refugia allowing a certain proportion of a fish school  
239 to remain inaccessible to predation. At each time step, a predation efficiency rate can be  
240 calculated for each fish school (i.e. the food biomass ingested within a time step over the maximum  
241 ingestion rate), from which growth, starvation and reproduction rates are determined. In OSMOSE,  
242 the functions defining growth and mortality are deterministic. The main source of stochasticity  
243 comes from the species movement within their habitat and the order at which schools interact  
244 (through predation). Model details and equations are provided in Appendix A and on  
245 <https://documentation.osmose-model.org/>.

### 246 **2.3 Parameterization of OSMOSE-MED**

247 OSMOSE-MED covers the whole Mediterranean basin, from the Strait of Gibraltar to the Levant  
248 basin and from the Northern Adriatic Sea to the Southern Ionian Sea (Figure 1). It extends from  
249 approximately 26.9°N to 46.3°N in latitude and from approximately 5.6°W to 36.1°E in longitude.  
250 The Marmara Sea and the Black Sea are not included in the model. The OSMOSE-MED is built  
251 on a regular grid divided into cells of 20x20 km (for a total 6229 cells). Grid resolution was a  
252 compromise between the fine scale ecology of the modelled species and computation time  
253 limitations. The time step was set according to the spatial resolution. Here we adopted a time  
254 resolution of 15 days within which species were assumed to have access to the first layer of  
255 surrounding cells when foraging for prey.

256 A 15-daily climatology was constructed from the 2006-2013 outputs of the biogeochemical model  
257 Eco3M-S and used to force the HTL model (offline coupling). The forcing model outputs were thus  
258 reflecting an average year in the period 2006-2013, characterized by a seasonal and a spatial  
259 variability of climate and plankton state variables. The coupling between NEMOMED 12/Eco3M-  
260 S and OSMOSE was realized through the predation process. At each time step and location, the  
261 biomass of the 6 plankton groups was used as potential prey fields forcing the HTL model. As



262 within OSMOSE, predation upon plankton groups is an opportunistic size-based process (Travers-  
263 Trolet et al., 2014) controlled by a minimum and a maximum predation size ratio parameter.  
264 Benthic organisms (mainly invertebrates, crustaceans, polychaetes) are part of the diets of several  
265 HTL species included in OSMOSE-MED but they were explicitly modelled neither in ECO3M-S  
266 nor in OSMOSE. We therefore created an additional “benthos” compartment for which no life cycle  
267 or dynamics were modelled, but a few parameters were provided (size range and trophic level in  
268 Table 1) as well as a biomass level (derived from Piroddi et al. 2017) that was considered uniform  
269 over the Mediterranean Sea.

270 Regarding HTL species, 100 fish, cephalopod and crustacean species were explicitly modelled in  
271 OSMOSE-MED: 86 fish species, 5 cephalopods and 10 crustaceans (Appendix B). The selection  
272 of the 86 fish species was strongly dependent on data availability for model parameterization  
273 (biological parameters and life history traits for example) and for confronting model’s output to  
274 observations (species biomass data for example). Data search and mining for the  
275 parameterization of the modelled species life cycles represented a significant time investment.  
276 From the 635 fish species included in the FishMed database (Albouy et al., 2015), we searched  
277 the scientific literature and found the life history parameters (i.e. growth, reproduction and  
278 mortality) required to parameterize the OSMOSE model for only 86 fish species. Cephalopod and  
279 crustacean species were selected for their high commercial value, high contribution to total  
280 biomass and data availability. They also play an important role in food web dynamics (Peristeraki  
281 et al., 2005; Roberts, 2003) and represent key components in several Ecopath models applied to  
282 ecosystems in the Mediterranean Sea (e.g., Bănaru et al., 2013; Corrales et al., 2017; Hattab et  
283 al., 2013; Piroddi et al., 2017). All these species represent on average around 95 % of declared  
284 fisheries catches in the 2006-2013 period (FAO, 2006-2017). The biological parameters linked to  
285 growth (i.e. Von Bertalanffy parameters, length-weight relationship parameters), mortalities (e.g.  
286 maximum age, natural mortality not explicitly represented in OSMOSE, age/size at recruitment),  
287 reproduction (i.e. size at maturity, relative fecundity) and predation (minimum and maximum  
288 predation size ratios), along with their sources, are detailed in Appendix B and C. As much as  
289 possible, data were specific to Mediterranean ecosystems and were derived from or used by stock  
290 assessment working groups in the Mediterranean Sea.

291 Within each time step (15 days), the following events occur successively in OSMOSE-MED  
292 (Figure 1). First, each school is uniformly distributed over space according to a unique distribution  
293 map specified for each species (see 2.4). In this application of OSMOSE, due to the lack of  
294 observations, we did not account for any seasonal or ontogenic variation in fish distributions. As  
295 the maps do not change from one-time step to the next, schools can move to an adjacent cell or

296 remain in the same cell following a random walk process (Shin et al., 2004; Travers-Trolet et al.,  
297 2014). Second, mortalities such as predation mortality, additional natural mortality and fishing  
298 mortality are applied to schools. The order at which schools interact as well as the order of  
299 mortality events is randomly drawn within each time step. Third, food intake, subsequent to  
300 predation events, modulates the growth in weight and size of species and their starvation level.  
301 Finally, reproduction occurs for fish having a length greater than the length at sexual maturity and  
302 allows the introduction of new schools of age 0 (eggs) in the system (Appendix A).  
303

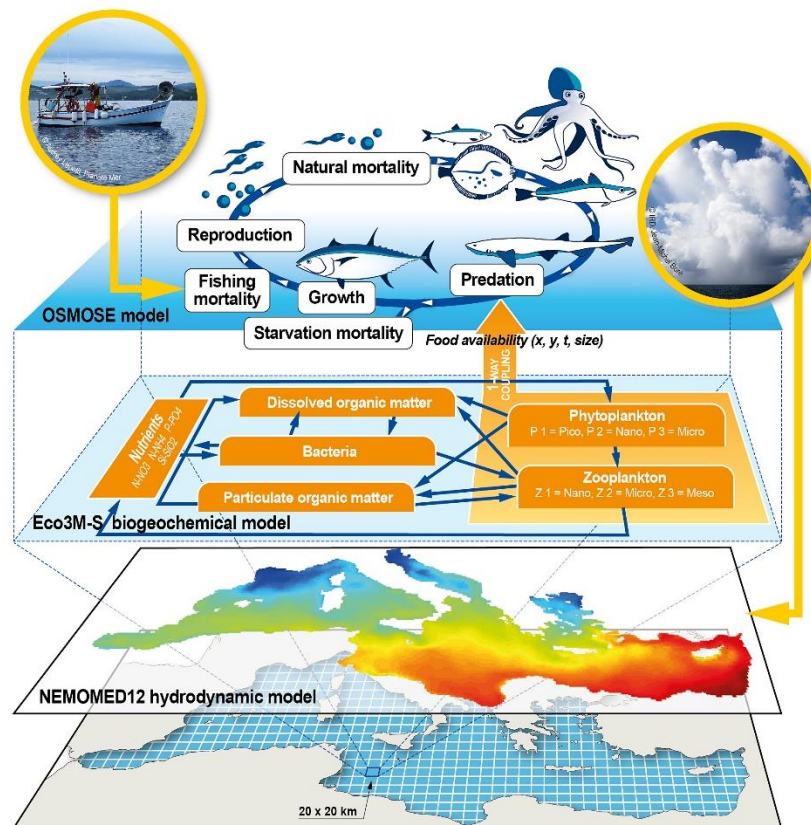

304  
305 *Figure 1 Conceptual representation of the End-to-End model “OSMOSE-MED” applied to the whole Mediterranean Sea.*  
306 *The high trophic levels OSMOSE model is forced (1-way coupling) by the biogeochemical Eco3M-S model through the*  
307 *predation by high trophic levels (i.e. fish, cephalopods and crustaceans) on low trophic levels (i.e. phyto and zoo-*  
308 *plankton). Eco3M-S is forced by the NEMOMED 12 hydrodynamic model. Impacts of climate variability and fishing*  
309 *mortality can be taken into account explicitly. (in color)*

## 310 **2.4 Modelling high trophic level species distribution**

311 A niche modelling approach based on environmental data has been used to generate species  
312 distribution maps in the Mediterranean Sea. These distribution maps are then used in input of  
313 OSMOSE. Occurrences of the species included in OSMOSE-MED were compiled and merged  
314 from multiple sources : the Ocean Biogeographic Information System (OBIS: [www.iobis.org](http://www.iobis.org)), the

315 Global Biodiversity Information Facility (GBIF: [www.gbif.org](http://www.gbif.org)) the Food and Agriculture  
316 Organisation's Geonetwork portal ([www.fao.org/geonetwork](http://www.fao.org/geonetwork)) and the atlas of Fishes of the  
317 Northern Atlantic and Mediterranean from the FishMed database (Albouy et al., 2015) (Appendix  
318 D). Values of environmental predictor variables at these locations were extracted from the World  
319 Ocean Atlas 2013 version 2 for climate data  
320 (<https://www.nodc.noaa.gov/OC5/woa13/woa13data.html>). To take into account the vertical  
321 distribution of species in the water column six environmental metrics were derived from monthly  
322 temperature and salinity climatologies: mean sea surface temperature and salinity (0-50 m depth),  
323 mean vertical temperature and salinity (0-200m depth) and mean sea bottom temperature and  
324 salinity (50m – maximum bathymetry depth). These metrics were used to model bioclimatic  
325 envelopes for each species. The use of environmental variables assumed that current species  
326 ranges are mainly driven by the abiotic environment, which is a reasonable hypothesis for marine  
327 species for which water temperature has been commonly considered as the main driver of fish  
328 geographic ranges (Ben Rais Lasram et al., 2010; Ben Rais Lasram and Mouillot, 2008; Cheung  
329 et al., 2009; Sabatés et al., 2006).

330 Present distributions were modelled using eight climate suitability models (generalized linear  
331 models, generalized additive models, classification tree analysis, boosted regression trees,  
332 random forests, multivariate adaptive regression splines, artificial neural networks and flexible  
333 discriminant analysis) embedded in the BIOMOD2 R package (Thuiller et al., 2009).

334 OBIS and GBIF databases provide only occurrence data at world scale (Hattab et al., 2014). To  
335 build reliable species distribution models, pseudo-absences (PAs) were generated in order to  
336 better characterize the environmental conditions experienced by species within their current  
337 ranges (Hattab et al., 2013b, 2014). PAs were selected randomly, outside the suitable area of the  
338 surface range envelope model. The number of simulated PAs was the double of occurrence data  
339 and they were equally weighted to the presence points during the fitting process.

340 In order to assess the accuracy of our final distributions, the True Skill Statistic (TSS, Allouche et  
341 al. (2006)) was used to measure the performance of each model. It represents a combined  
342 measure of the sensitivity (i.e. the proportion of correctly predicted presences) and specificity (i.e.  
343 the proportion of correctly predicted absences).

344 For each species, the consensus distribution was obtained with an ensemble forecast approach.  
345 Results were weighted according to the True Skill Statistic criterion (Allouche et al., 2006), i.e.  
346 weights were calculated on the basis of models' accuracy in independent situations (Thuiller et  
347 al., 2009). To derive a consensus prediction, only the "best" model outputs (i.e. models with a TSS  
348 > 0.6) were kept (Appendix D). To transform the probabilistic consensus distribution into a

349 presence/absence distribution, we preserved the occurrence probabilities for pixels above the  
350 sensitivity–specificity sum maximization threshold (i.e. the threshold that maximized the TSS  
351 criterion), and set to zero the occurrence probability for pixels under the threshold (Barbet-Massin  
352 et al., 2009). Spatial distribution maps are available in Appendix D.

### 353 **2.5 Calibration of the end-to-end model OSMOSE-MED**

354 An Evolutionary Algorithm (EA), inspired by the process of Darwinian evolution and developed for  
355 the calibration of complex stochastic models such as OSMOSE, has been used to calibrate the  
356 E2E model OSMOSE-MED (Duboz et al., 2010; Oliveros-Ramos and Shin, 2016). By estimating  
357 some unknown parameters (i.e. larval mortality rates of HTL species, availability coefficients of  
358 LTL species to all HTL species and fishing mortality for exploited species), the calibration process  
359 aims to constrain predicted biomasses and catches of HTL species by OSMOSE-MED within  
360 realistic ranges. The model was confronted to observed data using a maximum likelihood  
361 approach (Oliveros-Ramos et al. 2017). A log-normal distribution was assumed for the biomass  
362 and catch errors.

363 The aim of the EA is to optimize an objective function over a given search parameter space, a  
364 penalized negative log-likelihood function in our case (Oliveros-Ramos et al., 2017). A population  
365 of ‘individuals’, where each individual is a set of parameters (called the genotype) in the search  
366 space, is first created. Different unknown combinations of parameters are tested in order to  
367 minimize the objective function. Computation of the phenotype (i.e. outputs produced by a run of  
368 OSMOSE-MED with a given set of parameters) and of the fitness (i.e. goodness of fit from the  
369 minimization of the negative log-likelihood function) is done in a second step. At each generation  
370 (i.e. iteration of the optimization process), the algorithm calculates an “optimal parent”, which  
371 results from the recombination of the parameter sets that provide the best solution for each  
372 objective (partial likelihoods for species biomass and catch) (Oliveros-Ramos and Shin, 2016).  
373 The optimal parent is then used to produce a new set of parameter combinations (by  
374 recombination/mutation) which constitutes the next generation. The EA is run until the  
375 convergence of the objective function or is stopped after a given number of generations (Duboz  
376 et al., 2010; Oliveros-Ramos et al., 2017; Oliveros-Ramos and Shin, 2016).

377 A steady state calibration of the OSMOSE-MED model was performed using the mean of reported  
378 and reconstructed catches averaged over the period 2006-2013 (called hereafter “reference state  
379 period”) as target data. For tuna and other large pelagic species (e.g., the swordfish *Xiphias*  
380 *gladius*), catch data were extracted from ICCAT statistics database. For all other exploited  
381 species, reported fisheries landings were provided by the FAO-GFCM database  
382 (<http://www.fao.org/gfcm/data/capture-production-statistics>) and reconstructed catches were

383 obtained from the Sea Around Us project (Zeller and Pauly, 2015). Reconstructed catches from  
384 the Sea Around Us were used in order to reduce data gaps and take into account discards and  
385 illegal, unreported and unregulated fishing in the Mediterranean Sea, where actual catches are  
386 often underestimated (European Commission, 2003; Moutopoulos and Koutsikopoulos, 2014).  
387 Cumulated biomass from stock assessments from different GSAs (Geographical Sub-Area) of the  
388 Mediterranean Sea were used when available and realistic (i.e. when cumulated available  
389 biomass by species was higher than the average of FAO-SAU catches), and averaged over the  
390 reference state period (e.g., for *Merluccius merluccius*, *Sardina pilchardus* or *Engraulis*  
391 *encrasicolus*) (Appendix C). Biomass estimates of *Thunnus thynnus* and *Thunnus alalunga* were  
392 based on experts' knowledge (Fromentin J.M. and Winker H., personal communications). For all  
393 other species for which biomass estimates were not available, we applied strong penalties to the  
394 objective function when output biomass from OSMOSE-Med did not stand within plausible ranges.  
395 Specifically, we considered FAO reported catches as a minimum threshold for species biomass  
396 and the maximum biomass threshold was derived from mean FAO-SAU catches and a fisheries  
397 exploitation rate of 15 % that is assumed to be a very low exploitation rate in the context of  
398 Mediterranean fisheries (Vasilakopoulos et al., 2014),  
399 The model was run for 100 years for each set of parameters to make sure that OSMOSE-MED  
400 reached a steady state and only the last 30 years were analyzed by the EA. The calibration  
401 process allowed to estimate a set of parameters for each species represented in the OSMOSE-  
402 MED: coefficients of plankton accessibility of the 7 LTL groups considered in the model (7  
403 parameters), larval mortality rates of the 100 HTL species (100 parameters) and fishing mortality  
404 rates for species for which catch data were available (87 parameters).  
405 Following the methodology described in Oliveros-Ramos et al. (2017), a sequential multi-phase  
406 calibration was applied to estimate the 194 unknown parameters (Oliveros Ramos, 2014), with  
407 three successive calibration phases detailed in Table 2.  
408 The optimization process involved the use of Calibrar and OSMOSE R packages (Oliveros-Ramos  
409 et al., 2017; Oliveros-Ramos and Shin, 2016) available from the CRAN website ([https://cran.r-](https://cran.r-project.org/web/packages/calibrar)  
410 [project.org/web/packages/calibrar](https://cran.r-project.org/web/packages/calibrar)). The calculation was performed using DATARMOR, the High  
411 Performance Computing (HPC) facilities of "Pôle de Calcul et de Données Marines" of  
412 IFREMER (<https://wwz.ifremer.fr/pcdm/Equipement>). 36 compute nodes representing 1008 cores  
413 (2.4Ghz) and around 4 To of RAM (Random Access Memory) were mobilized to perform the  
414 calibration, which involved several iterative trials during more than one year.

415 Table 2 Order at which parameters were estimated in the multi-phase calibration of the OSMOSE-MED model, using  
416 the evolutionary optimization algorithm included in the Calibrar R package.

| Phase | Parameters                                | Number of estimated parameters | Number of generations |
|-------|-------------------------------------------|--------------------------------|-----------------------|
| 1     | Coefficients of plankton accessibility    | 7                              | 100                   |
| 2     | Previous parameters + larval mortalities  | 107 (including previous 7)     | 200                   |
| 3     | Previous parameters + fishing mortalities | 194 (including previous 107)   | 600                   |

417  
418 Due to the inherent stochasticity of OSMOSE, 10 replicated simulations (i.e. with identical set of  
419 parameters) were averaged to analyze the outputs of the last 10 years.

## 420 2.6 Evaluation of OSMOSE-MED outputs with independent data

421 In order to evaluate the capacity of OSMOSE-MED to predict the spatial distribution of the whole  
422 biomass in a realistic way, we confronted the model's output to observed data that were not used  
423 neither for the calibration of OSMOSE-MED, its parameterization, nor the climate niche modelling  
424 that led to species distribution maps. The ranking of Geographical Sub-Areas (GSAs), based on  
425 cumulated biomass estimates by species (in kg.km<sup>-2</sup>) from the MEDITS survey (International  
426 bottom trawl survey in the Mediterranean, Bertrand et al., 2002) in 2006-2013 was compared to  
427 the ranking predicted from OSMOSE-MED (see Appendix F for the correspondence between GSA  
428 number, their names and their sizes). To evaluate the consistency of the OSMOSE-MED model  
429 at the community level, the mean trophic level (mTL) of each species has been calculated and  
430 compared to three different sources: the FishMed database, a database which contains ecological  
431 and biological traits for 635 Mediterranean fish species (Albouy et al., 2015), the Ecopath model  
432 built at the Mediterranean basin scale by Piroddi et al. (2017, 2015a) and a review of feeding  
433 habits and trophic levels of 148 Mediterranean fish species (Karachle and Stergiou, 2017; Stergiou  
434 and Karpouzi, 2002).

435 An important step in the validation of the model lied in the confrontation of simulated species diets  
436 to observations and to the current knowledge of the trophic functioning of the Mediterranean  
437 ecosystem. In OSMOSE, the diet composition of a species is not determined *a priori* in input of  
438 the model but it emerges from the assumption of an opportunistic predation process, based on  
439 predator-prey size constraints and spatio-temporal co-occurrence. To check whether this size-  
440 based predation rule led to realistic and consistent dietary features, we focused on the diet  
441 compositions of four of the most important species in terms of volume or value of catches in the  
442 Mediterranean Sea, namely the European anchovy, the European pilchard, the Red mullet and  
443 the European hake. We specifically compared the diets of the adults from OSMOSE-MED to the  
444 diets derived from the mass-balanced Ecopath model of the Mediterranean Sea (Piroddi et al.,

445 2015a) as the functional groups in the latter model were mostly parameterized to represent the  
446 adults. The diet matrix used for parameterizing Ecopath was compiled from the available literature  
447 and mostly based on empirical data (Piroddi et al., 2015a, 2017) it was thus used as a convenient  
448 way to access observed diets and current knowledge on major trophic interactions, at least for the  
449 well-studied species.

### 450 **3 Results and discussion**

#### 451 **3.1 Calibration**

452  
453 OSMOSE-MED reached a steady state after around 50 years of simulation. The evolutionary  
454 algorithm converged and stabilized after 500 generations. Both negative log-likelihoods and global  
455 AIC improved during each phase but regarding the global evolution of the likelihoods larval  
456 mortalities seemed to be the parameters playing the most important role in the calibration process.  
457 Accessibility coefficients of LTL groups to HTL organisms ranged between around  $10^{-9}$  and  $10^{-1}$   
458 (Appendix E). The smallest values were obtained for small size plankton groups (except for  
459 picophytoplankton), which could be expected in view of their high biomass and low predation rates  
460 by HTL organisms (Jackson and Lenz, 2016; Morote et al., 2010; Pepin and Penney, 2000). In  
461 contrast, higher coefficients were found for mesozooplankton and benthos groups, for which  
462 around 1 and 0.5 % were respectively available to predation by HTL. These coefficients were in  
463 the same order of magnitude than in other modelled ecosystems (e.g Grüss et al., 2015; Marzloff  
464 et al., 2009; Travers-Trolet et al., 2014).

465 Estimated larval mortality rates ( $M_0$ ) ranged between 0.14 and 10.60  $\text{year}^{-1}$  for the caramote prawn  
466 (*Penaeus kerathurus*) and the small-spotted catshark (*Scyliorhinus canicula*), respectively  
467 (Appendix E). The larval mortality rate found for *P. kerathurus* is probably too low compared to the  
468 value ( $M_0=1.58 \text{ year}^{-1}$ ) estimated by Halouani et al. (2016b) with the OSMOSE-GoG model and  
469 the biomass estimated by our model stands outside a valid interval. The majority of larval  
470 mortalities were comprised between 1.49 and 5.29  $\text{year}^{-1}$  (mean =  $3.69 \pm 2.70 \text{ year}^{-1}$ ; Appendix  
471 E). A low larval mortality rate estimated by the evolutionary algorithm for a particular species does  
472 not necessarily mean that the total natural mortality is small but may also reflect that most of the  
473 sources of mortality (predation by the other modelled species for example) are simulated explicitly  
474 in the model (Travers-Trolet et al., 2014).

475 Because fishing mortality rates ( $F$ ) estimated by stock assessments were not available for all  
476 exploited species, we have chosen to estimate these parameters by confronting the model's  
477 output to observed and reconstructed catches during the third phase of the calibration process.

478 Most of the fishing mortality rates were within the range of 0.23 to 0.8  $year^{-1}$  and global fishing  
479 mortality rate was on average  $0.60 \pm 0.48 year^{-1}$  (Appendix E).

## 480 **3.2 Confronting OSMOSE-MED to observations and current knowledge**

### 481 **3.2.1 Species biomass**

482 The estimated biomass, averaged over the last ten years of a simulation and over ten  
483 replicates, were globally in acceptable intervals (i.e. above FAO reported catch and below a  
484 theoretical maximum biomass if we consider an exploitation rate of 15 % for the averaged  
485 FAO-SAU catches) (Figure 2). For species for which biomass from stock assessments were  
486 available, as is the case for instance for the European pilchard (*Sardina pilchardus*), the  
487 European anchovy (*Engraulis encrasicolus*) or the European hake (*Merluccius merluccius*),  
488 the total biomass predicted by OSMOSE-MED were slightly higher or very close to previously  
489 estimated biomass (Figure 2). Given that stock assessments were mostly available for  
490 European waters, a higher estimated biomass for species like *Sardina pilchardus*,  
491 *Parapenaeus longirostris* or *Mullus barbatus barbatus* could actually reflect a biomass volume  
492 present in the southern part or in areas not assessed in the Mediterranean Sea. Overall, the  
493 European anchovy and the European pilchard (around 1.8 millions of tons of biomass)  
494 represented, in cumulated, around 50 % of the total biomass of the system (excluding plankton  
495 organisms). The prevalence, in terms of biomass, of pelagic fishes was also found in an  
496 Ecopath model of the Mediterranean Sea (Piroddi et al., 2015a). For species like *Crangon*  
497 *crangon*, *Atherina boyeri* and *Etrumeus teres*, due to their highly variable population dynamics  
498 (high fecundity, short lifespan, high biomass turnover rate), biomass have been particularly  
499 difficult to calibrate and were finally overestimated by OSMOSE-MED. Moreover, for non-  
500 native species (e.g. *Etrumeus teres*), more research is needed on their biology and ecology in  
501 their new expansion areas, in order to get robust life history traits estimates, and to improve  
502 model predictions (Dimarchopoulou et al., 2017; Katsanevakis et al., 2014, 2012). The lack of  
503 stock assessments and the sometimes difficult access to the results of these assessments  
504 constitute some real barriers to the development, parameterization and calibration of  
505 ecosystem models in the region (Coll et al., 2013; Katsanevakis et al., 2015; Piroddi et al.,  
506 2015a). Around 25 % of landed biomass and less than 10 % of exploited stocks are currently  
507 assessed and on an irregular basis (Tsikliras et al., 2015). Moreover, the monitoring of fish  
508 stocks is hindered by the lack of biological or ecological observational data for far too many  
509 stocks, with approximately 80 % of landings coming from data-deficient stocks  
510 (Dimarchopoulou et al., 2017; Le Quesne et al., 2013).



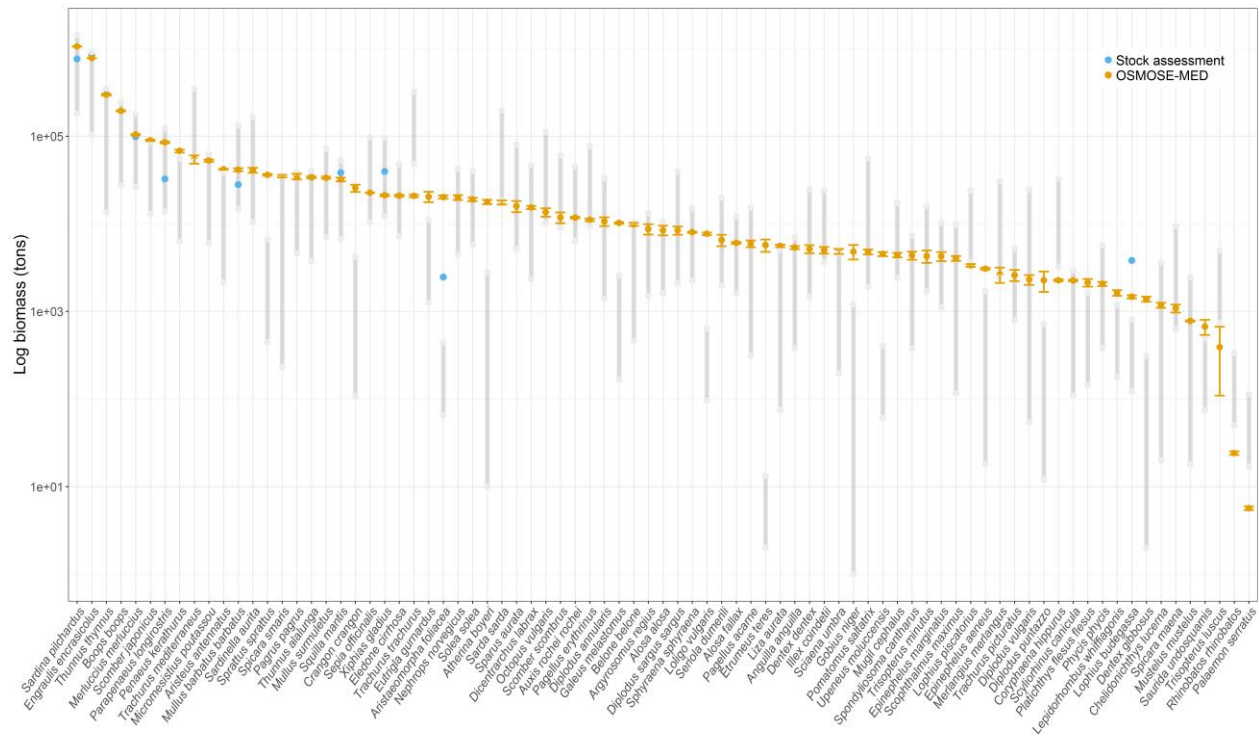

511

512 *Figure 2 Average predicted biomass in log scale and associated standard deviation of exploited species (87 species*  
 513 *out of the 100 modelled) (orange circles). Blue circles represent cumulated biomass from stock assessments (only*  
 514 *cumulated biomass higher than FAO reported catch were represented). Minimum and maximum of grey segments are*  
 515 *respectively the FAO reported catch and a theoretical maximum biomass considering an exploitation rate of 15 % and*  
 516 *the average between FAO and Sea Around Us catch. (in color)*

517 The model properly predicted the spatial distribution of the overall biomass, at least for the  
 518 northern part of the Mediterranean Sea where MEDITS survey were conducted, as suggested by  
 519 the significant Spearman's rank correlation coefficient value of 0.71 between MEDITS and  
 520 OSMOSE-MED biomass ranking. Existing differences between the ranking of some GSAs can be  
 521 explained in two ways. For instance, in Corsica Island, OSMOSE-MED predicted less relative  
 522 biomass (rank 15 out of a total of 16 GSAs) than estimated by MEDITS survey (rank 8). This is  
 523 partly due to the very narrow continental shelf around Corsica Island and to the resolution of our  
 524 model (20x20 km<sup>2</sup>) that could be too coarse to represent the dynamics in this area. Therefore, the  
 525 climate niche models and resulting distribution maps in input of OSMOSE-MED were not resolving  
 526 precisely enough the spatial distribution of the species closely associated to the Corsican  
 527 continental shelf. The development of OSMOSE-MED at a finer resolution scale has been  
 528 attempted in the early stages of the model configuration, but the computational cost has been  
 529 judged too high for the calibration process (at least two to three times the necessary computation  
 530 time for a 10x10km<sup>2</sup> resolution). On the contrary, for GSAs ranking higher in OSMOSE-MED than  
 531 in MEDITS ranks (i.e. below the 1:1 line in Figure 3), the differences could be explained by the

532 fact that MEDITS is a demersal trawl survey thereby having a low catchability for small pelagic  
533 fishes. Even though trawl survey data were useful for assessing the spatial and temporal trends  
534 of pelagic species in the Mediterranean Sea (Brind'Amour et al., 2016), some biases may exist  
535 such as the biomass of some small pelagic fishes being potentially largely underestimated by the  
536 survey.  
537

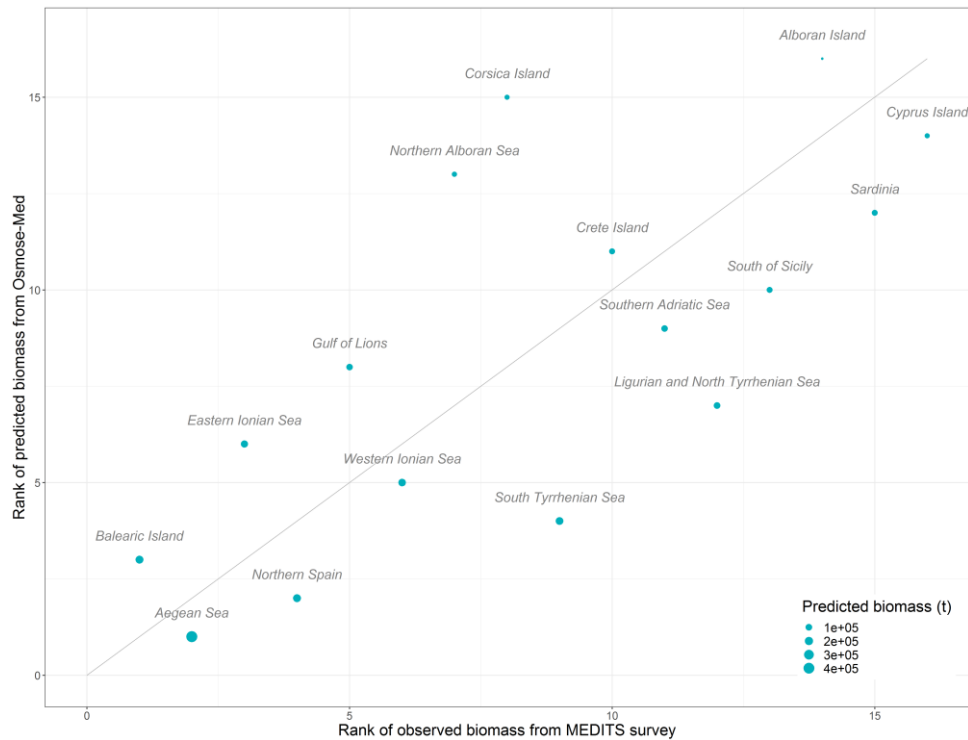

538  
539 *Figure 3 Comparison of predicted and observed ranks of total biomass by Geographical Sub-area (GSA). Observed*  
540 *total biomass are from the MEDITS survey (2006-2013). Circle size is proportional to the total predicted biomass by*  
541 *GSA. Solid line is 1:1 relationship. (in color)*

### 542 **3.2.2 Species catches**

543 Catches predicted by OSMOSE-MED were globally consistent with catch data in the  
544 Mediterranean Sea (Figure 4 and Figure 5). Our model predicted a total catch of around  
545 802 470 t at the whole basin scale that compares well with the 681 243 t recorded by the FAO  
546 and with the 952 930 t reconstructed by the Sea Around Us (817 087 t in average). The  
547 European pilchard and the European anchovy represented almost 30 % of the total catches in  
548 OSMOSE-MED and around 40 % in reported or reconstructed catches over the 2006-2013  
549 period (FAO, 2016; Pauly and Zeller, 2016). According to Stergiou et al. (2015), small pelagic  
550 species, mainly European anchovy and European pilchard, dominate the landings across the  
551 entire Mediterranean Sea, with 34 % of cumulated landings in the western Mediterranean,  
552 41 % in the central part and 25 % in the eastern part. The Spearman's correlation coefficient

553 between the rank of the average FAO-SAU catches by species and that estimated by  
554 OSMOSE-MED was 0.79 (Figure 5). The main differences between predicted and averaged  
555 reported-reconstructed catches came from the under- or over-estimation of species biomass  
556 by the model. For instance, the common prawn (*Palaemon serratus*) seemed to be  
557 underestimated in terms of predicted biomass and catch. For species for which biomass  
558 estimated by stock assessment were available, the OSMOSE-MED model predicted the  
559 catches relatively well. The estimated catches for the European anchovy was, for instance,  
560 around 118 480 t in OSMOSE-MED while reported and reconstructed catches by the FAO and  
561 the SAU over the 2006-2013 period were 103 650 t and 169 870 t, respectively.

562 In the present version of OSMOSE (Version 3 update 2), fishing effort is homogeneous in  
563 space. Catch outputs could be improved with a spatialization of the fishing effort which is  
564 implemented in the last version under development. However, in the Mediterranean Sea, data  
565 on fishing effort and distribution is either unavailable or difficult to access in some regions  
566 (Katsanevakis et al., 2015). One solution could be the use of the new "Global Fishing Watch"  
567 database which collects data from the automatic identification system (AIS) of fishing fleets all  
568 around the world (Kroodsmas et al., 2018). An index of the fishing effort in the Mediterranean  
569 Sea could be calculated by evaluating the fishing time by vessel characteristics (Kroodsmas et  
570 al., 2018). However, as most of the vessels composing the Mediterranean fleet are less than  
571 10 m and AIS is only compulsory for large European vessels, estimations would remain  
572 underestimated (Ferrà et al., 2018). Fitting an ecosystem model based on catch data is a  
573 difficult task in the Mediterranean Sea due to the poor quality of fisheries statistics (Pauly et  
574 al., 2014; Piroddi et al., 2017). A significant quantity of catches is still not recorded or some  
575 stocks are data-deficient. The almost twice difference between reported and reconstructed  
576 catches highlighted by Pauly and Zeller (2016) illustrates this issue. As suggested by Piroddi  
577 et al. (2017), better catch data and improved availability for modelling studies could help to  
578 estimate more realistic fishing mortalities and trends in space and time. The new  
579 MedFish4Ever initiative, launched by the European Commission in 2017 to rebuild a  
580 sustainable fisheries sector, could play a key role in the improvement of such data, at least for  
581 the northern Mediterranean (<https://ec.europa.eu/fisheries/inseparable/en/medfish4ever>).

582

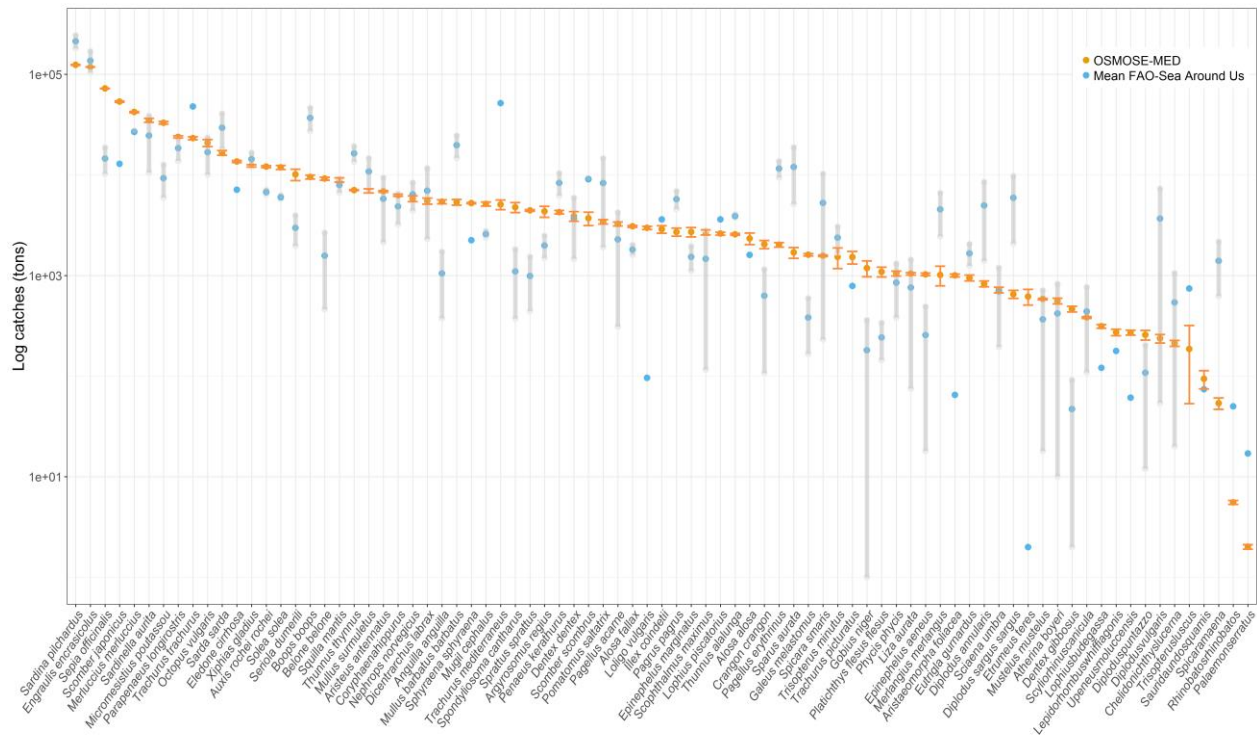

583

584 *Figure 4 OSMOSE-MED average predicted catches on log scale and associated standard deviation of all exploited*  
585 *species (orange circles). Blue dots represent the average FAO – SAU catch which served as target data during the*  
586 *calibration process. Minimum and maximum of grey segments are the FAO reported catch and the SAU reconstructed*  
587 *catch, respectively. Predictions and data for the 2006-2013 period. (in color)*

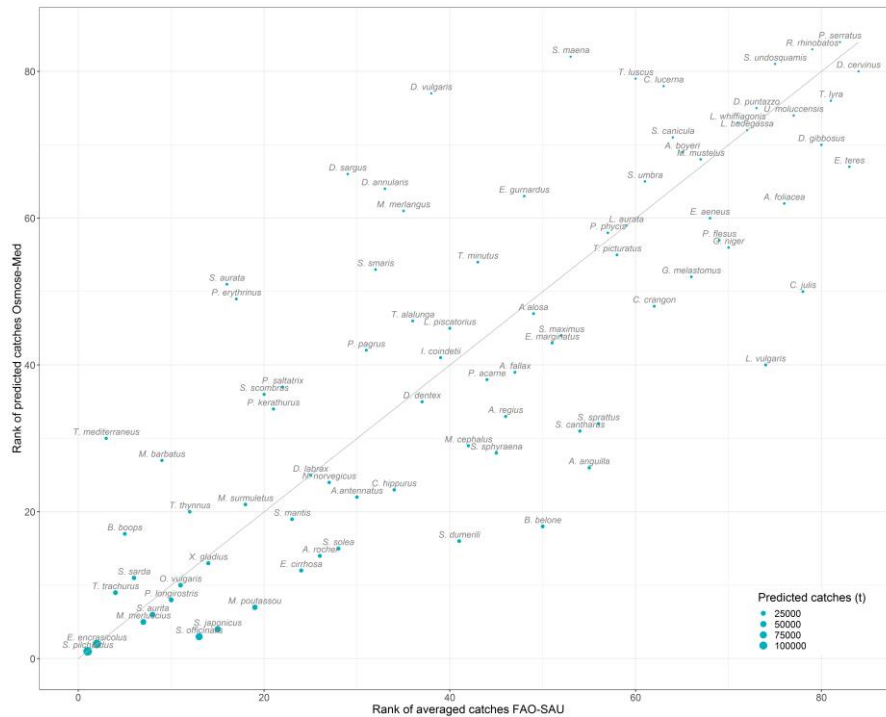

588

589 *Figure 5 Comparison of predicted and observed (average FAO-SAU catches) ranks of catches by species. Circle size*  
 590 *is proportional to the predicted catches. Predictions and data for the 2006-2013 period. Solid line is 1:1 relationship. (in*  
 591 *color)*

### 592 **3.2.3 Species trophic levels**

593 In general, the trophic levels from OSMOSE-MED were consistent with the results obtained by  
 594 other studies in the Mediterranean Sea (Figure 6). 69 % of the OSMOSE-MED mTLs were close  
 595 to previously estimated mTLs by less than 0.3. Among the 81 species that had several mTL data  
 596 sources, OSMOSE-MED mTLs stood within the range of previously estimated mTLs for 58 species  
 597 (72 % of the species). Trophic levels from OSMOSE-MED were generally higher than those of the  
 598 Ecopath model and generally lower than those of FishMed which were mainly taken from the  
 599 Fishbase database (Albouy et al., 2015). The significant Spearman's correlation coefficients  
 600 between the trophic levels from OSMOSE-MED and the trophic levels coming from FishMed,  
 601 Ecopath and the review of Karachle and Stergiou (2017) were 0.67, 0.51 and 0.68, respectively.  
 602 In OSMOSE-MED, Swordfish *Xiphias gladius* had the highest trophic level (mTL =  $4.64 \pm 0.002$ )  
 603 whereas European pilchard had the lowest (mTL =  $3.11 \pm 0.0003$ ). Large pelagic fish species like  
 604 Swordfish, Dolphinfish (*Coryphaena hippurus*), Bluefin and Albacore tunas (*Thunnus thynnus* and  
 605 *Thunnus alalunga*), Atlantic bonito (*Sarda sarda*), shark species like Common guitarfish  
 606 (*Rhinobatos rhinobatos*), Common smooth-hound (*Mustelus mustelus*) and Small-spotted  
 607 catshark (*Scyliorhinus canicula*) and demersal species such as European hake (*Merluccius*  
 608 *merluccius*) were all identified as top-predators in the OSMOSE-MED model (i.e. mTL > 4.15).

609 These results are consistent with other trophic models built in the Mediterranean Sea which  
610 identified large pelagic fish species and sharks species (except from Common guitarfish) at the  
611 top of the food web (Albouy et al., 2010; Coll et al., 2007; Corrales et al., 2015; Halouani et al.,  
612 2016; Hattab et al., 2013a).

613

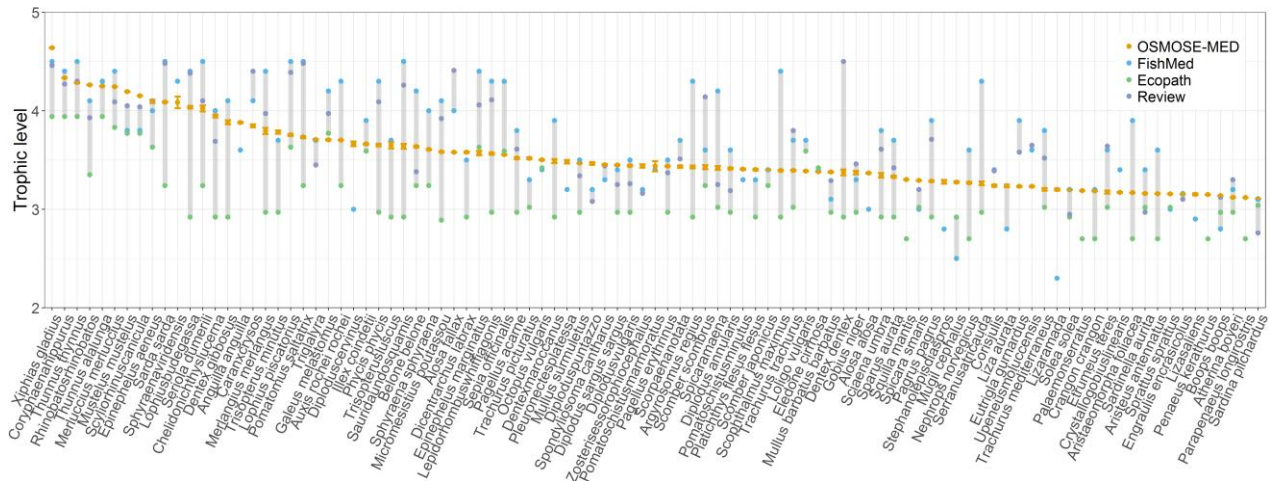

614

615 *Figure 6 Mean predicted trophic levels of OSMOSE-MED species (orange circles) and trophic levels from the FishMed*  
616 *database of Albouy et al. (2015) (blue circles), the Mediterranean Ecopath model from Piroddi et al. (2017, 2015a)*  
617 *(green circles) and a review proposed by Karachle and Stergiou (2017) (purple circles). (in color)*

### 618 **3.2.4 Species diets**

619

620 OSMOSE-MED and the Mediterranean Ecopath model were more or less in agreement with  
621 regard to the prey composition of the diet of the four species under scrutiny (Figure 7). For  
622 European anchovy and the European pilchard, the simulated diets were similar and largely  
623 dominated in composition by the zooplankton, a pattern which is in agreement with other  
624 observations (Karachle and Stergiou, 2017; Stergiou and Karpouzi, 2002). In OSMOSE-MED,  
625 European pilchard consumed less phytoplankton (4.5 %, mainly diatoms) than in the Ecopath  
626 model (10 %) but the result remains qualitatively realistic (i.e. the main prey is zooplankton  
627 followed by phytoplankton). The dominance of zooplankton prey in the diet of pilchards could be  
628 explained in two different ways. Firstly, the availability coefficients of phytoplankton groups to HTL  
629 organisms were estimated to be very low by the model calibration (range between  $10^{-1}$  to  $10^{-7}$ ),  
630 which does not allow European pilchard to feed more on these groups. Secondly, it has been  
631 shown that populations of European pilchard, living in lower productivity region, as is the case for  
632 the Mediterranean Sea, would preferentially capture larger individual prey via particulate feeding  
633 and would consume more zooplankton than populations of the Northwest Atlantic (Costalago et  
634 al., 2015). Regarding Red mullet (*Mullus barbatus barbatus*) the main difference between the two

635 models lies in the higher proportion of zooplankton preyed in OSMOSE-MED. Some of the  
 636 crustaceans eaten in the Ecopath model were either included in the benthos group in OSMOSE-  
 637 MED or explicitly modelled at the species level as is the case for *P. longirostris* and *P. kerathurus*  
 638 that appeared in the simulated diet of Red mullet. For European hake, most of the prey eaten in  
 639 OSMOSE-MED were grouped in more aggregated trophic boxes in Ecopath. For instance,  
 640 shrimps were grouped in the functional group "crustaceans" in Ecopath, Octopus were grouped in  
 641 the "benthic cephalopods" compartment and some species like *Mullus surmuletus* or *Boops boops*  
 642 were grouped in the "small demersals" functional group. However, the percent contribution of  
 643 some prey like European pilchard or European anchovy differs between the two models. The  
 644 European pilchard represented, for instance, 5.7 % of the diet of the European hake in OSMOSE-  
 645 MED and 12.5 % in Ecopath. However, hake diet varies greatly as a function of prey availability  
 646 and abundance, in Mediterranean Sea as well as in other areas of the Atlantic Ocean (Carrozzi et  
 647 al., 2018; Cartes et al., 2009; Velasco and Olaso, 1998). Carrozzi et al. (2018) found, for instance,  
 648 that in the central Mediterranean Sea, European pilchard and European anchovy represented 3.78  
 649 and 1.32 % of hake diet, respectively.

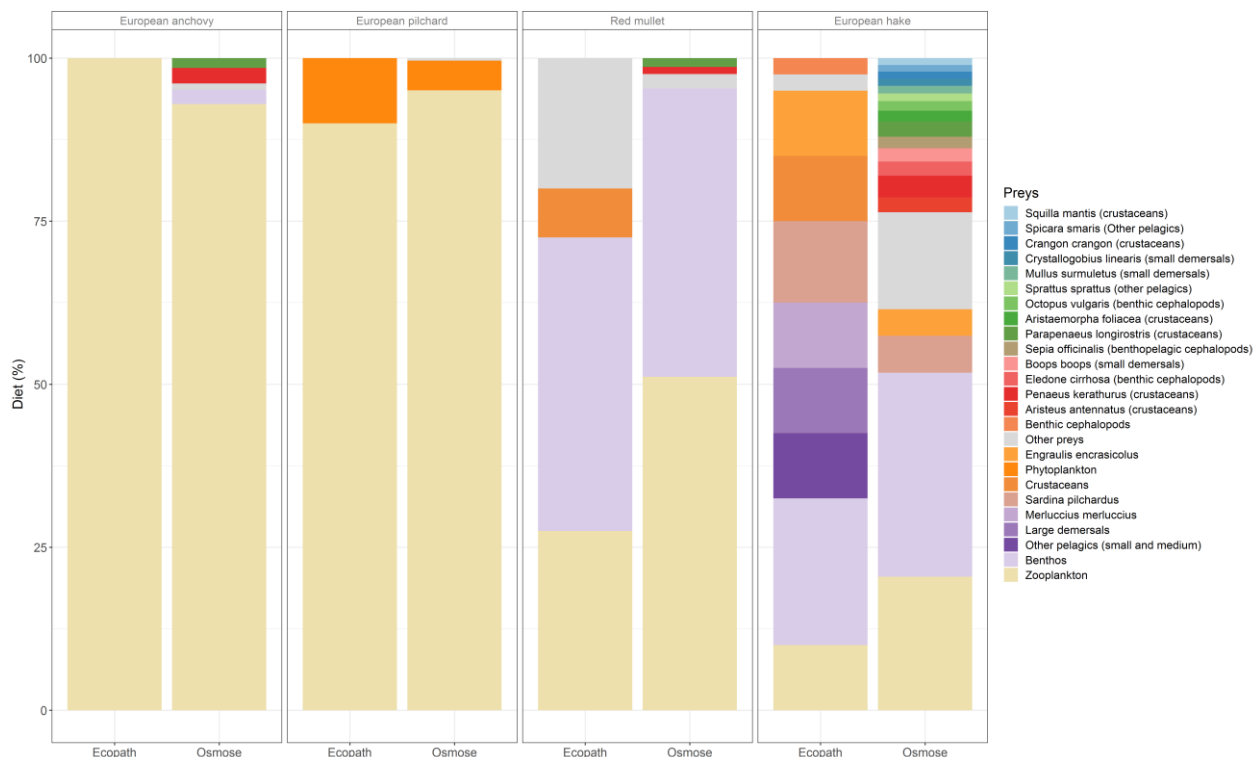

650  
 651 **Figure 7** Diets simulated by OSMOSE-MED and the Mediterranean Ecopath model for four species (two small pelagic  
 652 fish species (European anchovy and European pilchard) and two demersal fish species (Red mullet and European  
 653 hake)). Functional groups of Ecopath model in which OSMOSE-MED species are grouped are indicate in brackets. In  
 654 both cases diets are expressed as percentage of prey by mass. (in color)

### 655 **3.2.5 Emerging spatial patterns**

656 The total biomass (all HTL species confounded) was mainly distributed on the continental shelf  
657 and in areas where the primary and secondary productions were higher (Figure 8) in line with past  
658 studies (Durrieu de Madron et al., 2011, Bosc et al. 2004). The higher biomass found in highly  
659 productive areas (the Gulf of Lions, the Catalan Sea or the South Levantine Sea with the Rhône,  
660 the Ebro and the Nile rivers enhancing primary productivity through nutrient discharge, hence  
661 playing a major role for local food webs) suggested that primary production, by bottom-up control,  
662 was one of the main drivers of the biomass distribution of HTL organisms in the Mediterranean  
663 Sea. Numerous Ecopath models built at more local scales in the region confirm this assumption  
664 (Coll et al., 2006, 2007; Coll and Libralato, 2012; Halouani et al., 2016; Hattab et al., 2013a). The  
665 control of marine productivity, from plankton to fish, principally mediated through bottom-up  
666 processes that could be traced back to the characteristics of riverine discharges has also been  
667 demonstrated by Macias et al. (2014). These characteristics render the Mediterranean Sea  
668 vulnerable to sources of potential impacts on primary production such as climate change or marine  
669 pollution (Cheung et al., 2011; Jochum et al., 2012; Macias et al., 2015; Moullec et al., 2016) and  
670 highlight the need of expliciting the forcing of physicochemical oceanographic drivers on the  
671 dynamics of high trophic level organisms in a single modelling framework, to deal with possible  
672 bottom-up control and improve our capacity to predict future ecosystem changes (Piroddi et al.,  
673 2017; Rose et al., 2010; Travers-Trolet et al., 2014). On the other hand, since fishing effort was  
674 spatially uniform in our model, we could not assess precisely the direct role of fishing in the spatial  
675 distribution of the HTL biomass but rather the impacts on species biomass, species composition  
676 and interactions which were indirectly reflected by the biomass distribution over the Mediterranean  
677 Sea.

678 A low gradient of biomass is observed from Northwestern to Southeastern regions following  
679 already observed gradients of production and biodiversity (Coll et al., 2010; Mouillot et al., 2011).  
680 In OSMOSE-MED, the Western Mediterranean Sea accounted for 35 % of the total biomass, the  
681 Adriatic Sea 9 %, the Ionian and central Mediterranean Sea 31 % while the Aegean and Levantine  
682 Sea accounted for 26 % of the total biomass. The total biomass in the Adriatic Sea may be  
683 underestimated in view of the results found with a Mediterranean Ecopath model (Piroddi et al.,  
684 2015a). In this latter model, the Adriatic Sea was the area with the highest total biomass, followed  
685 by the Western Mediterranean Sea and the Ionian and Eastern Seas. This is partly due to the  
686 underestimation by the Eco3M-S biogeochemical model of the concentration in phytoplankton in  
687 this area (Kessouri, 2015). The Eastern basin appeared highly oligotrophic with low biomass  
688 values from OSMOSE-MED, with the exception of the Gulf of Gabès and waters surrounding the



689 Nile plume, two regions that have been both characterized by high productivity (Hattab et al.,  
690 2013a).

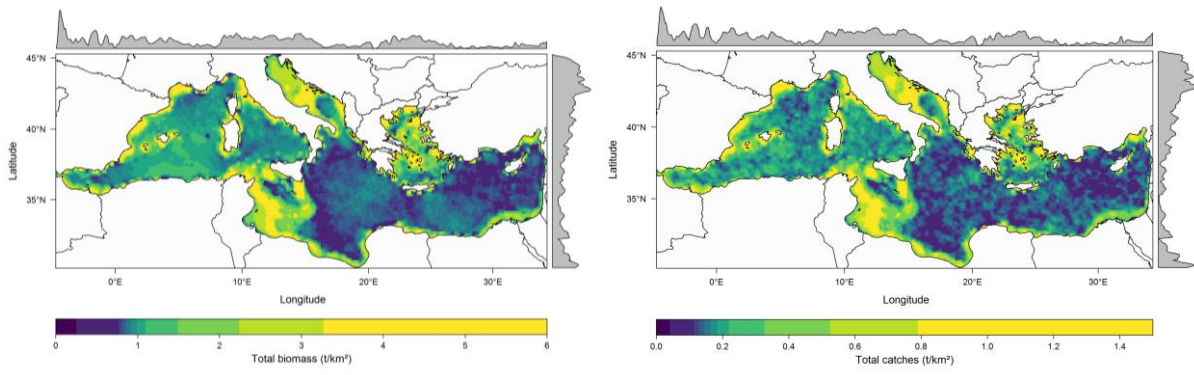

691  
692 *Figure 8 Spatial distribution of the simulated total biomass (left) and catches (right) (all HTL species confounded)*  
693 *expressed in t.km<sup>-2</sup>. Upper and right hand side plots respectively represent the meridionally and zonally averaged*  
694 *distribution of biomass and catches. (in color)*

695 The spatial distribution of catches, resulting from uniformly distributed fishing effort, globally  
696 followed the spatial distribution of the biomass with relatively less catches in the high sea (Figure  
697 8). As for biomass, a low gradient of catch is predicted from the North to the South and from the  
698 West to the East, following the Mediterranean productivity pattern (Bosc et al., 2004; Ignatiades  
699 et al., 2009). The Iberian shelf waters, the Balearic Sea, the Gulf of Lions, the North Tyrrhenian  
700 Sea, the Adriatic Sea, the south Sicily, the Gulf of Gabès and the north Aegean Sea were all  
701 identified as hotspots of exploitation and concentrated most of the catches at the whole  
702 Mediterranean scale. Most of these areas were identified as highly impacted areas (Micheli et al.,  
703 2013a), in particular by demersal fishing activities and climate-induced changes, and coincide with  
704 the areas of conservation concern identified by Coll et al. (2012).

705 The analysis of the distribution of the mean size of the community revealed a clear gradient from  
706 the Northwestern to the Southeastern regions (Figure 9). Despite the fact that small pelagic fish  
707 species were mainly concentrated in the Northwestern region, the mean size weighted by  
708 abundance values was higher in the northern part of the basin. Some authors have argued that,  
709 the high salinity and temperature, the low productivity or a combination of all these factors were  
710 responsible for the "Levantine nanism" phenomenon that induces small body sizes for all species  
711 in general (Por, 1989; Sharir et al., 2011; Sonin et al., 2007). In OSMOSE, the growth in size is  
712 linked to the predation success. If the predation success is lower than a critical predation efficiency  
713 corresponding to maintenance requirements, fish can starve and growth rate is reduced (Shin and  
714 Cury, 2001). Thus, the very oligotrophic conditions of the eastern Mediterranean Sea could lead  
715 to reduced growth rates and smaller sizes for some species in OSMOSE-MED. The analysis of  
716 the spatial distribution of the mean size also suggested that large individuals were found in the

717 Western high sea where catches were lower (Figure 9). On the one hand, large fish species  
718 abundances (e.g. *Thunnus thynnus* or *Xiphias gladius*) were more important in the Western high  
719 sea locally, which explains the large mean body size. On the other hand, the small sizes found in  
720 certain areas (e.g., Balearic Island, Northern Adriatic Sea, Cyprus Island) could be the result of  
721 heavy fishing, as fishing preferentially harvest larger-bodied individuals (from a given species, or  
722 species with larger mean size) but also induce a selection of slow growing individuals (Jørgensen  
723 et al., 2007; Law, 2000; Shin et al., 2005).

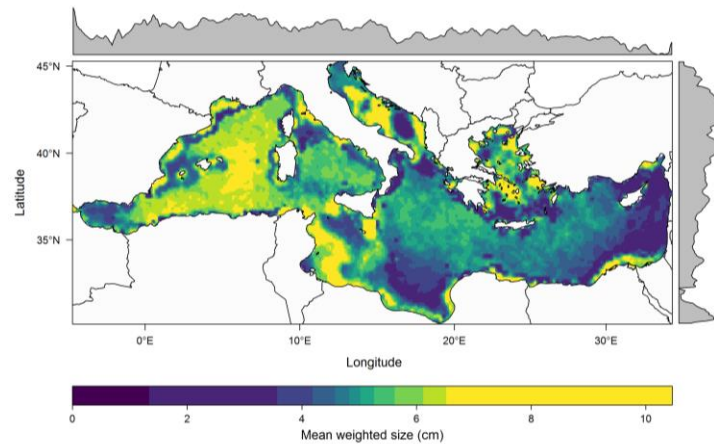

724  
725 *Figure 9 Spatial distribution of mean size (mean size weighted by species abundance) expressed in cm. Margins*  
726 *represent the meridionally and zonally averaged weighted size. (in color)*

## 727 4 Conclusion and perspectives

### 728 4.1 The OSMOSE-MED challenge

729 In this paper, we described for the first time OSMOSE-MED, an integrated end-to-end model  
730 based on the coupling between a physical model (NEMOMED 12), a low trophic levels model  
731 (Eco3M-S) and a high trophic levels model (OSMOSE), representing the ecosystem dynamics  
732 and the trophic structure of the Mediterranean Sea in the 2006-2013 period. Numerous trophic  
733 modelling works have been realized in the Mediterranean Sea, most often at local scale (Bănaru  
734 et al., 2013; Coll et al., 2007; Corrales et al., 2017b, 2017a; Halouani et al., 2016; Hattab et al.,  
735 2013a) and rarely at the basin scale (Albouy et al., 2014; Piroddi et al., 2015a, 2017). The present  
736 study is the first attempt of an end-to-end trophic approach at the scale of the Mediterranean Sea,  
737 with an explicit modelling of the multispecies, spatial, life traits based and whole life cycle of the  
738 dynamics of a hundred interacting species. This was a challenge in many respects. The OSMOSE  
739 model, originally developed by Shin and Cury (2004, 2001), has never been tested for such a  
740 great number of species in interactions and at such a wide spatial scale. As noted by Fu et al.  
741 (2017), no more than 10 to 15 key species were usually included in an OSMOSE model. A few

742 reasons could explain the selection of a restricted number of species to be modelled: (i) the  
743 extensive information and data required on species life histories to properly parameterize a model,  
744 (ii) the computation time and memory capacity to fit the model to observations, (iii) the desire to  
745 focus on major species and interactions only to simplify the complexity of the system. Here, we  
746 chose to move the modelling approach a step forward by being much more comprehensive in the  
747 explicit modelling of a large number of marine species in the Mediterranean Sea. Our ultimate  
748 goal was to build a tool representing the diversity of species and their interactions in a realistic  
749 way at the scale of the Mediterranean Sea, to be able to address the future impacts of climate  
750 change (e.g., species distribution shifts and plankton production changes) combined with other  
751 anthropogenic drivers on biodiversity such as fishing, its spatial dynamics across the whole  
752 Mediterranean basin and across Geographical Sub-Areas (GSAs), and the potential cascading  
753 effects on food webs and ecosystem services. We could clearly take advantage of existing  
754 historical collections of biological and ecological data that were assembled in various databases  
755 by the time of the project onset. In addition, the access to the recently upgraded High Performance  
756 Calculation (HPC) platform DATARMOR freed us from some technical barriers, and allowed us to  
757 envisage the calibration of a complex model such as OSMOSE-MED.

758 The first challenge, as for most end-to-end models, was to search and integrate a large amount  
759 of data and information from various sources, databases, scientific and "grey" literatures as well  
760 as outputs from other models (de Mora et al., 2016; Fulton, 2010). To our knowledge, OSMOSE-  
761 MED is the most complete model built at the whole Mediterranean Sea scale, in terms of species  
762 and process representativeness. It integrates the best ecological knowledge in the Mediterranean  
763 Sea despite some gaps can be pointed out, mostly concerning for the fish species in the southern  
764 part of the basin (Dimarchopoulou et al., 2017). There is, for instance, no biological information  
765 for as many as 43 % of the Mediterranean fish species (Dimarchopoulou et al., 2017). The lack of  
766 biological and ecological data for a large number of species as well as the quality of commercial  
767 fisheries data, especially in the southern and eastern parts of the Mediterranean Sea, are  
768 hindrances to reliable stock assessments, to the development of more integrated ecosystem  
769 models, and thus to the implementation of an effective ecosystem-based management to achieve  
770 good environmental status in the Mediterranean Sea (Coll et al., 2013; Piroddi et al., 2015a, 2017).  
771 A crucial challenge is to increase the number of assessed stocks in order to ensure their  
772 sustainable exploitation in a first step, to allow the parameterization and calibration of more  
773 integrated ecosystem models that would support the development of ecosystem-based fisheries  
774 management at the Mediterranean basin scale in a second (Cardinale and Scarcella, 2017; Coll

775 et al., 2013; Colloca et al., 2013). Moreover, the region is generally suffering from the problem of  
776 data ownership, reliability, and accessibility (Katsanevakis et al., 2015).

777 The second challenge was to maintain in co-existence all HTL species and provide a realistic  
778 representation of the biodiversity. It was probably the most critical and time consuming step, given  
779 the stochasticity and the complexity of the model. The number of trophic links, the connectance,  
780 and the importance of feedback controls can be large in an OSMOSE model and can render the  
781 calibration procedure complicated and fastidious (Halouani et al., 2016; Marzloff et al., 2009;  
782 Travers-Trolet et al., 2014). We exploited the capacities of the evolutionary optimization algorithm  
783 in order to find a set of estimated parameters within a 195-dimensional search space (Oliveros-  
784 Ramos et al., 2017; Oliveros-Ramos and Shin, 2016) that reproduced state variables and  
785 indicators close to observations. The *calibrar* R package was used for the first time for such a  
786 complex model configuration (large number of parameters, stochastic model with many  
787 nonlinearities) and proved its capacity to solve complicated minimization problems (Oliveros-  
788 Ramos and Shin, 2016). For computational time reasons, and the need for continuous iterative  
789 trials and feedbacks between model's parameterization and observations, the calibration of  
790 OSMOSE-MED has taken more than one year and required the use of high performance  
791 computing facilities. The development of OSMOSE-MED represents a significant advance for  
792 OSMOSE and *calibrar* user's communities, but also more broadly in the field of ecosystem  
793 modelling, as a proof of concept that complex representation of species dynamics and their  
794 interactions can be achieved and can produce realistic spatial, multispecies, and whole life cycle  
795 dynamics under the influence of climate and anthropogenic drivers.

#### 796 **4.2 Limitations of the model**

797 Ecosystem models, despite their increasing complexity, granularity and representativeness are  
798 always idealised or simplified conceptual representations of very complex systems  
799 (Gunawardena, 2014). As all models involve some simplifications, certain limitations exist and can  
800 be discussed:

801 - *Benthos compartment*: an important benthopelagic coupling exists in the Mediterranean Sea  
802 and has been highlighted in several Ecopath models in the region (Bănaru et al., 2013; Coll et al.,  
803 2007; Corrales et al., 2015; Hattab et al., 2013a). Moreover, many species included in OSMOSE-  
804 MED have omnivorous and carnivorous diets partly based on benthic organisms such as  
805 polychaetes, amphipods or crustaceans. This is why a benthos "black box" has been added in  
806 OSMOSE-MED, with a constant biomass and a uniform spatial distribution. Given the importance  
807 of this trophic compartment in the Mediterranean Sea, this compartment would deserve an  
808 improved representation, for example by considering multiple functional groups having common

809 biological and ecological characteristics (e.g. meiofauna, bivalves, echinoderms) (Grüss et al.,  
810 2016). As these new developments are clearly impeded by the lack of data for both  
811 parameterization and calibration of the model, an intermediate complexity approach could be  
812 adopted by modelling these more refined benthic compartments as "background taxa" for which  
813 only predation, mean growth rate and spatial distribution are modelled. This new category of  
814 species of intermediate complexity, allowing to cope with limited datasets and to include more  
815 species of interest while keeping the model reasonably complex, was recently coded in OSMOSE  
816 (Fu et al., 2017).

817 - *Ontogenic changes in habitats*: Numerous species included in OSMOSE-MED exhibit clear  
818 ontogenic shifts in habitats in the Mediterranean Sea (Cartes et al., 2009; Druon et al., 2015, 2016;  
819 Giannoulaki et al., 2013b, 2013a; Macpherson, 1998). These ontogenic range shifts can play a  
820 critical role in population dynamics and ecosystem functioning (MacCall, 1990; Macpherson and  
821 Duarte, 1991; Methratta and Link, 2007). For instance, Caddy (1990) hypothesized that the  
822 sustainability of the majority of Mediterranean fisheries depended on spawners refuging on  
823 continental slopes. For most of the major commercial species (including hake, monkfish and  
824 shrimps) the continental slope and canyons are used as spawning areas that are less accessible  
825 to fishing fleets, while the continental shelf and the strip coast that are more intensively fished, are  
826 preferred zones for nurseries (Würtz, 2012). Therefore, including different spatial distribution maps  
827 (i.e. spawning and nursery grounds) for some key species like small pelagic fish (e.g. European  
828 anchovy, European pilchard or European mackerel) and demersal fish (e.g. European hake, Red  
829 mullet) could potentially improve the spatial representation of food webs and population dynamics,  
830 and their vulnerability to fishing. Habitat suitability models by stage or size class, that relate  
831 abundance information from surveys with environmental variables could be used in this purpose  
832 (Druon et al., 2015; Giannoulaki et al., 2013a).

833 - *Spatialized fishing effort/mortality*: As discussed above, OSMOSE-MED considered a uniform  
834 spatial distribution of fishing effort. Fishing effort being mainly distributed along the coasts and on  
835 the continental shelf, this assumption is not realistic (Kroodsma et al., 2018; Leleu et al., 2014;  
836 Maynou et al., 2011; Ramírez et al., 2018), though the lower biomass in the open sea enables to  
837 counterbalance this potential source of bias (Figure 8). Moreover, most fisheries targeting large  
838 pelagic fish such as tunas or swordfish operate in the open sea, due to the target species  
839 distribution pattern (Druon et al., 2016). Fishing effort metadata, reported at the species and  
840 Geographical-Sub area scales, from the Data Collection Reference Framework (GFCM, 2018)  
841 could be available in order to improve the differential pressures exerted by fishing across the  
842 Mediterranean sea. Another option to spatialize fishing effort/mortality would be to model as many

843 exploited populations in a species as the number of evaluated stocks. This supposes to know the  
844 true number of stocks in the Mediterranean Sea and the possible connectivities between them  
845 (Fiorentino et al., 2014; Ragonese et al., 2016).

846 - *Uncertainty*: Marine ecosystems are structurally complex, spatially and temporally variable,  
847 difficult and costly to observe, all of which can potentially lead to considerable uncertainty in model  
848 predictions (Cheung et al., 2016; Hill et al., 2007; Payne et al., 2016). There are many sources of  
849 uncertainty in ecosystem models, from the structural (model) uncertainty and the initialization and  
850 internal variability uncertainty to the parametric uncertainty (Payne et al., 2016). Assessing these  
851 different types of uncertainty would allow to build confidence intervals around our predictions with  
852 the OSMOSE-MED model and would clearly increase the relevance of using it in projections and  
853 in support of decision-making in the Mediterranean Sea (Gal et al., 2014; Hill et al., 2007; Hyder  
854 et al., 2015; Payne et al., 2016).

855 In the present study, the uncertainty due to the sources of input data (i.e. parametric uncertainty)  
856 could be tested as a first step. Most of the data used for parameterizing OSMOSE-MED come  
857 from the modelled area but some parameters for data-poor species (e.g., relative fecundity, growth  
858 parameters) were obtained from ecosystems outside the Mediterranean region and can differ  
859 considerably according to the ecosystem (Halouani et al., 2016). Sensitivity analysis on such  
860 parameters could be tested following the methodology employed in Lehuta et al. (2010) or Ortega-  
861 Cisneros et al. (2017).

#### 862 **4.3 Potential uses of OSMOSE-MED**

863 The OSMOSE-MED model is an integrated ecosystem model addressing the combined effects of  
864 fishing and climate change on marine biodiversity at the whole Mediterranean basin scale to  
865 provide scientific support to strategize fisheries management.

866 The model can for example provide insights on the impacts of climate change on operational  
867 fisheries reference levels, such as Maximum Sustainable Yield (MSY) and multi-species MSY at  
868 the Mediterranean Sea scale (Lehuta et al., 2016). It has also the capacity to guide the  
869 prioritization of multiple spatial conservation plans such as the implementation of coherent Marine  
870 protected Areas (MPAs) networks by European states (Lehuta et al., 2016; Liqueste et al., 2016;  
871 Micheli et al., 2013b) as required by the Marine Strategy Framework Directive (MSFD) (European  
872 Commission, 2008). Moreover, numerous biodiversity and food webs MSFD indicators can be  
873 directly derived from outputs of OSMOSE-MED, making this model a relevant tool to help the  
874 planning and integration of policies like the MSFD that seeks to achieve, for all European seas,  
875 "Good Environmental Status", by 2020 (Cardoso et al., 2010; Piroddi et al., 2015b). Model outputs  
876 can be used to provide an evidence base to inform decision-making, especially in the frame of the

877 EU's Blue growth strategy that supports sustainable growth in the marine and maritime sectors as  
878 a whole (European Commission, 2017), and the General Fisheries Commission for the  
879 Mediterranean (GFCM) mid-term strategy (2017-2020) that has been developed to support the  
880 achievement of the United Nations targets (e.g., the Sustainable Development Goal 14) (GFCM,  
881 2017b)  
882 OSMOSE-MED model can also be viewed as a tool to communicate effectively with managers  
883 and other non-scientist end users of Mediterranean ecosystems and help incorporating scientific  
884 evidence into environmental decision-making (Cartwright et al., 2016; Jönsson et al., 2015; Rose  
885 et al., 2010).

886

## 887 **Acknowledgements**

888 The authors acknowledge the Pôle de Calcul et de Données Marines (PCDM) for providing  
889 DATARMOR computational resources. URL: <http://www.ifremer.fr/pcdm>. We are grateful to the  
890 participants to the MEDITS survey program which has been conducted within the Data Collection  
891 Framework (DCF) since 1994. We also thank Sabine Drira for her help in developing species  
892 distribution models. Fabien Moullec was funded by a PhD grant from the French Ministry of higher  
893 Education, Research and Innovation. This work was partially funded by the *USBIO* project of the  
894 LabEx CeMEB, an ANR "Investissements d'avenir" program (ANR-10-LABX-04-01).

895

## 896 **Author contributions**

897 F.M. developed the model, acquired the data, analyzed and interpreted the data. L.V., P.V., N.B.,  
898 F.G. and Y-J.S. helped in developing the model. Y-J.S. helped in data analysis and interpretation.  
899 C.U. provided data on primary and secondary productions (from the biogeochemical model). P.V.  
900 and N.B. helped with the programming code of OSMOSE and use of the HPC cluster  
901 DATARMOR. P.C., A.E., C.F., M.G., A.J., A.L., E.L.D., P.M., P.P., M.T.S., I.T. and M.V. provided  
902 data from the MEDITS survey. F.M. led the drafting of the manuscript with the contributions and  
903 revisions from all the authors.

904

## 905 **Competing interests**

906 The authors declare no competing financial interests.

907

## 908 **References**

909 Albouy, C., Guilhaumon, F., Araújo, M.B., Mouillot, D., Leprieur, F., 2012. Combining projected  
910 changes in species richness and composition reveals climate change impacts on coastal

- 911 Mediterranean fish assemblages. *Glob. Change Biol.* 18, 2995–3003.  
912 <https://doi.org/10.1111/j.1365-2486.2012.02772.x>
- 913 Albouy, C., Guilhaumon, F., Leprieur, F., Lasram, F.B.R., Somot, S., Aznar, R., Velez, L., Loc'h,  
914 F.L., Mouillot, D., 2013. Projected climate change and the changing biogeography of  
915 coastal Mediterranean fishes. *J. Biogeogr.* 40, 534–547. <https://doi.org/10.1111/jbi.12013>
- 916 Albouy, C., Lasram, F.B.R., Velez, L., Guilhaumon, F., Meynard, C.N., Boyer, S., Benestan, L.,  
917 Mouquet, N., Douzery, E., Aznar, R., Troussellier, M., Somot, S., Leprieur, F., Le Loc'h,  
918 F., Mouillot, D., 2015. FishMed: traits, phylogeny, current and projected species distribution  
919 of Mediterranean fishes, and environmental data. *Ecology* 96, 2312–2313.  
920 <https://doi.org/10.1890/14-2279.1>
- 921 Albouy, C., Mouillot, D., Rocklin, D., Culioli, J.M., Loc'h, F.L., 2010. Simulation of the combined  
922 effects of artisanal and recreational fisheries on a Mediterranean MPA ecosystem using a  
923 trophic model. *Mar. Ecol. Prog. Ser.* 412, 207–221. <https://doi.org/10.3354/meps08679>
- 924 Albouy, C., Velez, L., Coll, M., Colloca, F., Loc'h, F.L., Mouillot, D., Gravel, D., 2014. From  
925 projected species distribution to food-web structure under climate change. *Glob. Change*  
926 *Biol.* 20, 730–741. <https://doi.org/10.1111/gcb.12467>
- 927 AllEnvi, 2016. Alliance nationale de recherche pour l'environnement (France). The Mediterranean  
928 region under climate change: a scientific update. IRD editions, Marseille.
- 929 Allouche, O., Tsoar, A., Kadmon, R., 2006. Assessing the accuracy of species distribution models:  
930 prevalence, kappa and the true skill statistic (TSS). *J. Appl. Ecol.* 43, 1223–1232.  
931 <https://doi.org/10.1111/j.1365-2664.2006.01214.x>
- 932 Anderson, T.R., Pondaven, P., 2003. Non-redfield carbon and nitrogen cycling in the Sargasso  
933 Sea: pelagic imbalances and export flux. *Deep Sea Res. Part Oceanogr. Res. Pap.* 50,  
934 573–591. [https://doi.org/10.1016/S0967-0637\(03\)00034-7](https://doi.org/10.1016/S0967-0637(03)00034-7)
- 935 Auger, P.A., Diaz, F., Ulses, C., Estournel, C., Neveux, J., Joux, F., Pujo-Pay, M., Naudin, J.J.,  
936 2011. Functioning of the planktonic ecosystem on the Gulf of Lions shelf (NW  
937 Mediterranean) during spring and its impact on the carbon deposition: a field data and 3-  
938 D modelling combined approach. *Biogeosciences* 8, 3231–3261.  
939 <https://doi.org/10.5194/bg-8-3231-2011>
- 940 Baklouti, M., Faure, V., Pawlowski, L., Sciandra, A., 2006. Investigation and sensitivity analysis of  
941 a mechanistic phytoplankton model implemented in a new modular numerical tool (Eco3M)  
942 dedicated to biogeochemical modelling. *Prog. Oceanogr.* 71, 34–58.  
943 <https://doi.org/10.1016/j.pocean.2006.05.003>
- 944 Bănanu, D., Mellon-Duval, C., Roos, D., Bigot, J.-L., Souplet, A., Jadaud, A., Beaubrun, P.,  
945 Fromentin, J.-M., 2013. Trophic structure in the Gulf of Lions marine ecosystem (north-  
946 western Mediterranean Sea) and fishing impacts. *J. Mar. Syst.* 111, 45–68.  
947 <https://doi.org/10.1016/j.jmarsys.2012.09.010>
- 948 Barbet-Massin, M., Walther, B.A., Thuiller, W., Rahbek, C., Jiguet, F., 2009. Potential impacts of  
949 climate change on the winter distribution of Afro-Palaeartic migrant passerines. *Biol. Lett.*  
950 *rsbl.2008.0715*. <https://doi.org/10.1098/rsbl.2008.0715>
- 951 Ben Rais Lasram, F., Guilhaumon, F., Albouy, C., Somot, S., Thuiller, W., Mouillot, D., 2010. The  
952 Mediterranean Sea as a 'cul-de-sac' for endemic fishes facing climate change. *Glob.*  
953 *Change Biol.* 16, 3233–3245. <https://doi.org/10.1111/j.1365-2486.2010.02224.x>
- 954 Ben Rais Lasram, F., Mouillot, D., 2008. Increasing southern invasion enhances congruence  
955 between endemic and exotic Mediterranean fish fauna. *Biol. Invasions* 11, 697.  
956 <https://doi.org/10.1007/s10530-008-9284-4>
- 957 Bertrand, J.A., Sola, L.G. de, Papaconstantinou, C., Relini, G., Souplet, A., 2002. The general  
958 specifications of the MEDITS surveys. *Sci. Mar.* 66, 9–17.  
959 <https://doi.org/10.3989/scimar.2002.66s29>
- 960 Beuvier, J., Béranger, K., Lebeaupin Brossier, C., Somot, S., Sevault, F., Drillet, Y., Bourdallé-  
961 Badie, R., Ferry, N., Lyard, F., 2012. Spreading of the Western Mediterranean Deep Water



- 962 after winter 2005: Time scales and deep cyclone transport. *J. Geophys. Res. Oceans* 117,  
963 C07022. <https://doi.org/10.1029/2011JC007679>
- 964 Beuvier, Jonathan, Brossier, C.L., Béranger, K., Arsouze, T., Bourdallé-Badie, R., Deltel, C.,  
965 Drillet, Y., Drobinski, P., Ferry, N., Lyard, F., Sevault, F., Somot, S., 2012. MED12, Oceanic  
966 component for the modeling of the regional Mediterranean earth system. *Mercator Ocean*  
967 *Quarterly Newsletter*, 46. <hal-01138958>.
- 968 Bosc, E., Bricaud, A., Antoine, D., 2004. Seasonal and interannual variability in algal biomass and  
969 primary production in the Mediterranean Sea, as derived from 4 years of SeaWiFS  
970 observations. *Glob. Biogeochem. Cycles* 18. <https://doi.org/10.1029/2003GB002034>
- 971 Bosello, F., Delpiazzi, E., Eboli, F., 2015. Acidification in the Mediterranean Sea: impacts and  
972 adaptation strategies. *Rev. Environ. Energy Econ. Re3* Forthcom.
- 973 Brind'Amour, A., Rochet, M.-J., Ordines, F., Hosack, G.R., Berthelé, O., Mérigot, B., Carbonara,  
974 P., Follesa, M.C., Jadaud, A., Lefkaditou, E., Maiorano, P., Peristeraki, P., Mannini, A.,  
975 Rabiller, M., Spedicato, M.T., Tserpes, G., Trenkel, V.M., 2016. Environmental drivers  
976 explain regional variation of changes in fish and invertebrate functional groups across the  
977 Mediterranean Sea from 1994 to 2012. *Mar. Ecol. Prog. Ser.* 562, 19–35.  
978 <https://doi.org/10.3354/meps11912>
- 979 Butchart, S.H.M., Walpole, M., Collen, B., van Strien, A., Scharlemann, J.P.W., Almond, R.E.A.,  
980 Baillie, J.E.M., Bomhard, B., Brown, C., Bruno, J., Carpenter, K.E., Carr, G.M., Chanson,  
981 J., Chenery, A.M., Csirke, J., Davidson, N.C., Dentener, F., Foster, M., Galli, A., Galloway,  
982 J.N., Genovesi, P., Gregory, R.D., Hockings, M., Kapos, V., Lamarque, J.-F., Leverington,  
983 F., Loh, J., McGeoch, M.A., McRae, L., Minasyan, A., Hernández Morcillo, M., Oldfield,  
984 T.E.E., Pauly, D., Quader, S., Revenga, C., Sauer, J.R., Skolnik, B., Spear, D., Stanwell-  
985 Smith, D., Stuart, S.N., Symes, A., Tierney, M., Tyrrell, T.D., Vié, J.-C., Watson, R., 2010.  
986 Global biodiversity: indicators of recent declines. *Science* 328, 1164–1168.  
987 <https://doi.org/10.1126/science.1187512>
- 988 Caddy, J.F., 1990. Options for the regulation of Mediterranean demersal fisheries. *Nat. Resour.*  
989 *Model.* 4, 427–475. <https://doi.org/10.1111/j.1939-7445.1990.tb00219.x>
- 990 Calvo, E., Simó, R., Coma, R., Ribes, M., Pascual, J., Sabatés, A., Gili, J., Pelejero, C., 2011.  
991 Effects of climate change on Mediterranean marine ecosystems: the case of the Catalan  
992 Sea. *Clim. Res.* 50, 1–29. <https://doi.org/10.3354/cr01040>
- 993 Cardinale, M., Scarcella, G., 2017. Mediterranean Sea: A Failure of the European Fisheries  
994 Management System. *Front. Mar. Sci.* 4. <https://doi.org/10.3389/fmars.2017.00072>
- 995 Cardoso, A.C., Cochrane, S., Doerner, H., Ferreira, J.G., Galgani, F., Hagebro, C., Hanke, G.,  
996 Hoepffner, N., Keizer, P.D., Law, R., Olenin, S., Piet, G.J., Rice, J., Rogers, S.I.,  
997 Swartenbroux, F., Tasker, M.L., Van de Bund, W., Piha, H., European Commission, Joint  
998 Research Centre, International Council for the Exploration of the Sea (ICES), 2010.  
999 Scientific support to the European Commission Marine Strategy Framework Directive:  
1000 management group report, EUR 24336 EN – 2010. Publications Office, Luxembourg.
- 1001 Carrozzi, V., Di Lorenzo, M., Massi, D., Titone, A., Ardizzone, G.D., Colloca, F., 2018. Prey  
1002 preferences and ontogenetic diet shift of European hake *Merluccius merluccius* (Linnaeus,  
1003 1758) in the central Mediterranean Sea. *Reg. Stud. Mar. Sci.*  
1004 <https://doi.org/10.1016/j.rsma.2018.100440>
- 1005 Cartes, J.E., Hidalgo, M., Papiol, V., Massutí, E., Moranta, J., 2009. Changes in the diet and  
1006 feeding of the hake *Merluccius merluccius* at the shelf-break of the Balearic Islands:  
1007 Influence of the mesopelagic-boundary community. *Deep Sea Res. Part Oceanogr. Res.*  
1008 *Pap.* 56, 344–365. <https://doi.org/10.1016/j.dsr.2008.09.009>
- 1009 Cartwright, S.J., Bowgen, K.M., Collop, C., Hyder, K., Nabe-Nielsen, J., Stafford, R., Stillman,  
1010 R.A., Thorpe, R.B., Sibly, R.M., 2016. Communicating complex ecological models to non-  
1011 scientist end users. *Ecol. Model.* 338, 51–59.  
1012 <https://doi.org/10.1016/j.ecolmodel.2016.07.012>

- 1013 Cheung, W.W.L., Dunne, J., Sarmiento, J.L., Pauly, D., 2011. Integrating ecophysiology and  
1014 plankton dynamics into projected maximum fisheries catch potential under climate change  
1015 in the Northeast Atlantic. *ICES J. Mar. Sci.* 68, 1008–1018.  
1016 <https://doi.org/10.1093/icesjms/fsr012>
- 1017 Cheung, W.W.L., Jones, M.C., Reygondeau, G., Frölicher, T.L., 2018. Opportunities for climate-  
1018 risk reduction through effective fisheries management. *Glob. Change Biol.* 0.  
1019 <https://doi.org/10.1111/gcb.14390>
- 1020 Cheung, W.W.L., Jones, M.C., Reygondeau, G., Stock, C.A., Lam, V.W.Y., Frölicher, T.L., 2016.  
1021 Structural uncertainty in projecting global fisheries catches under climate change. *Ecol.*  
1022 *Model.* 325, 57–66. <https://doi.org/10.1016/j.ecolmodel.2015.12.018>
- 1023 Cheung, W.W.L., Lam, V.W.Y., Sarmiento, J.L., Kearney, K., Watson, R., Pauly, D., 2009.  
1024 Projecting global marine biodiversity impacts under climate change scenarios. *Fish Fish.*  
1025 10, 235–251. <https://doi.org/10.1111/j.1467-2979.2008.00315.x>
- 1026 Christensen, V., Walters, C.J., 2004. Ecopath with Ecosim: methods, capabilities and limitations.  
1027 *Ecol. Model., Placing Fisheries in their Ecosystem Context* 172, 109–139.  
1028 <https://doi.org/10.1016/j.ecolmodel.2003.09.003>
- 1029 Coll, M., Cury, P., Azzurro, E., Bariche, M., Bayadas, G., Bellido, J.M., Chaboud, C., Claudet, J.,  
1030 El-Sayed, A.-F., Gascuel, D., Knittweis, L., Pipitone, C., Samuel-Rhoads, Y., Taleb, S.,  
1031 Tudela, S., Valls, A., Workshop Participants, 2013. The scientific strategy needed to  
1032 promote a regional ecosystem-based approach to fisheries in the Mediterranean and Black  
1033 Seas. *Rev. Fish Biol. Fish.* 23, 415–434. <https://doi.org/10.1007/s11160-013-9305-y>
- 1034 Coll, M., Libralato, S., 2012. Contributions of food web modelling to the ecosystem approach to  
1035 marine resource management in the Mediterranean Sea. *Fish Fish.* 13, 60–88.  
1036 <https://doi.org/10.1111/j.1467-2979.2011.00420.x>
- 1037 Coll, M., Palomera, I., Tudela, S., Sardà, F., 2006. Trophic flows, ecosystem structure and fishing  
1038 impacts in the South Catalan Sea, Northwestern Mediterranean. *J. Mar. Syst.* 59, 63–96.  
1039 <https://doi.org/10.1016/j.jmarsys.2005.09.001>
- 1040 Coll, M., Piroddi, C., Albouy, C., Lasram, F.B.R., Cheung, W.W.L., Christensen, V., Karpouzi, V.S.,  
1041 Guilhaumon, F., Mouillot, D., Paleczny, M., Palomares, M.L., Steenbeek, J., Trujillo, P.,  
1042 Watson, R., Pauly, D., 2012. The Mediterranean Sea under siege: spatial overlap between  
1043 marine biodiversity, cumulative threats and marine reserves. *Glob. Ecol. Biogeogr.* 21,  
1044 465–480. <https://doi.org/10.1111/j.1466-8238.2011.00697.x>
- 1045 Coll, M., Piroddi, C., Steenbeek, J., Kaschner, K., Lasram, F.B.R., Aguzzi, J., Ballesteros, E.,  
1046 Bianchi, C.N., Corbera, J., Dailianis, T., Danovaro, R., Estrada, M., Froglija, C., Galil, B.S.,  
1047 Gasol, J.M., Gertwagen, R., Gil, J., Guilhaumon, F., Kesner-Reyes, K., Kitsos, M.-S.,  
1048 Koukouras, A., Lampadariou, N., Laxamana, E., Cuadra, C.M.L.-F. de la, Lotze, H.K.,  
1049 Martin, D., Mouillot, D., Oro, D., Raicevich, S., Rius-Barile, J., Saiz-Salinas, J.I., Vicente,  
1050 C.S., Somot, S., Templado, J., Turon, X., Vafidis, D., Villanueva, R., Voultsiadou, E., 2010.  
1051 The Biodiversity of the Mediterranean Sea: Estimates, Patterns, and Threats. *PLOS ONE*  
1052 5, e11842. <https://doi.org/10.1371/journal.pone.0011842>
- 1053 Coll, M., Santojanni, A., Palomera, I., Tudela, S., Arneri, E., 2007. An ecological model of the  
1054 Northern and Central Adriatic Sea: Analysis of ecosystem structure and fishing impacts. *J.*  
1055 *Mar. Syst.* 67, 119–154. <https://doi.org/10.1016/j.jmarsys.2006.10.002>
- 1056 Colloca, F., Cardinale, M., Maynou, F., Giannoulaki, M., Scarcella, G., Jenko, K., Bellido, J.M.,  
1057 Fiorentino, F., 2013. Rebuilding Mediterranean fisheries: a new paradigm for ecological  
1058 sustainability. *Fish Fish.* 14, 89–109. <https://doi.org/10.1111/j.1467-2979.2011.00453.x>
- 1059 Colloca, F., Mastrantonio, G., Lasinio, G.J., Ligas, A., Sartor, P., 2014. *Parapenaeus longirostris*  
1060 (Lucas, 1846) an early warning indicator species of global warming in the central  
1061 Mediterranean Sea. *J. Mar. Syst., The wrapping up of the IDEADOS project: International*  
1062 *Workshop on Environment, Ecosystems and Demersal Resources, and Fisheries* 138, 29–  
1063 39. <https://doi.org/10.1016/j.jmarsys.2013.10.007>

- 1064 Colloca, F., Scarcella, G., Libralato, S., 2017. Recent Trends and Impacts of Fisheries Exploitation  
1065 on Mediterranean Stocks and Ecosystems. *Front. Mar. Sci.* 4.  
1066 <https://doi.org/10.3389/fmars.2017.00244>
- 1067 Corrales, X., Coll, M., Ofir, E., Piroddi, C., Goren, M., Edelist, D., Heymans, J.J., Steenbeek, J.,  
1068 Christensen, V., Gal, G., 2017a. Hindcasting the dynamics of an Eastern Mediterranean  
1069 marine ecosystem under the impacts of multiple stressors. *Mar. Ecol. Prog. Ser.* 580, 17–  
1070 36. <https://doi.org/10.3354/meps12271>
- 1071 Corrales, X., Coll, M., Tecchio, S., Bellido, J.M., Fernández, Á.M., Palomera, I., 2015. Ecosystem  
1072 structure and fishing impacts in the northwestern Mediterranean Sea using a food web  
1073 model within a comparative approach. *J. Mar. Syst.* 148, 183–199.  
1074 <https://doi.org/10.1016/j.jmarsys.2015.03.006>
- 1075 Corrales, X., Ofir, E., Coll, M., Goren, M., Edelist, D., Heymans, J.J., Gal, G., 2017b. Modeling the  
1076 role and impact of alien species and fisheries on the Israeli marine continental shelf  
1077 ecosystem. *J. Mar. Syst.* 170, 88–102. <https://doi.org/10.1016/j.jmarsys.2017.02.004>
- 1078 Costalago, D., Garrido, S., Palomera, I., 2015. Comparison of the feeding apparatus and diet of  
1079 European sardines *Sardina pilchardus* of Atlantic and Mediterranean waters: ecological  
1080 implications. *J. Fish Biol.* 86, 1348–1362. <https://doi.org/10.1111/jfb.12645>
- 1081 Cramer, W., Guiot, J., Fader, M., Garrabou, J., Gattuso, J.-P., Iglesias, A., Lange, M.A., Lionello,  
1082 P., Llasat, M.C., Paz, S., Peñuelas, J., Snoussi, M., Toreti, A., Tsimplis, M.N., Xoplaki, E.,  
1083 2018. Climate change and interconnected risks to sustainable development in the  
1084 Mediterranean. *Nat. Clim. Change* 1. <https://doi.org/10.1038/s41558-018-0299-2>
- 1085 de Mora, L., Butenschön, M., Allen, J.I., 2016. The assessment of a global marine ecosystem  
1086 model on the basis of emergent properties and ecosystem function: a case study with  
1087 ERSEM. *Geosci. Model Dev.* 9, 59–76. <https://doi.org/10.5194/gmd-9-59-2016>
- 1088 Dimarchopoulou, D., Stergiou, K.I., Tsikliras, A.C., 2017. Gap analysis on the biology of  
1089 Mediterranean marine fishes. *PLOS ONE* 12, e0175949.  
1090 <https://doi.org/10.1371/journal.pone.0175949>
- 1091 Druon, J.-N., Fiorentino, F., Murenu, M., Knittweis, L., Colloca, F., Osio, C., Mérigot, B., Garofalo,  
1092 G., Mannini, A., Jadaud, A., Sbrana, M., Scarcella, G., Tserpes, G., Peristeraki, P.,  
1093 Carlucci, R., Heikkonen, J., 2015. Modelling of European hake nurseries in the  
1094 Mediterranean Sea: An ecological niche approach. *Prog. Oceanogr.* 130, 188–204.  
1095 <https://doi.org/10.1016/j.pocean.2014.11.005>
- 1096 Druon, J.-N., Fromentin, J.-M., Hanke, A.R., Arrizabalaga, H., Damalas, D., Tičina, V., Quílez-  
1097 Badia, G., Ramirez, K., Arregui, I., Tserpes, G., Reglero, P., Deflorio, M., Oray, I., Saadet  
1098 Karakulak, F., Megalofonou, P., Ceyhan, T., Grubišić, L., MacKenzie, B.R., Lamkin, J.,  
1099 Afonso, P., Addis, P., 2016. Habitat suitability of the Atlantic bluefin tuna by size class: An  
1100 ecological niche approach. *Prog. Oceanogr.* 142, 30–46.  
1101 <https://doi.org/10.1016/j.pocean.2016.01.002>
- 1102 Duboz, R., Versmisse, D., Travers, M., Ramat, E., Shin, Y.-J., 2010. Application of an evolutionary  
1103 algorithm to the inverse parameter estimation of an individual-based model. *Ecol. Model.*  
1104 221, 840–849. <https://doi.org/10.1016/j.ecolmodel.2009.11.023>
- 1105 Durrieu de Madron, X., Guieu, C., Sempéré, R., Conan, P., Cossa, D., D’Ortenzio, F., Estournel,  
1106 C., Gazeau, F., Rabouille, C., Stemmann, L., Bonnet, S., Diaz, F., Koubbi, P., Radakovitch,  
1107 O., Babin, M., Baklouti, M., Bancon-Montigny, C., Belviso, S., Bensoussan, N., Bonsang,  
1108 B., Bouloubassi, I., Brunet, C., Cadiou, J.-F., Carlotti, F., Chami, M., Charmasson, S.,  
1109 Charrière, B., Dachs, J., Doxaran, D., Dutay, J.-C., Elbaz-Poulichet, F., Eléaume, M.,  
1110 Eyrolles, F., Fernandez, C., Fowler, S., Francour, P., Gaertner, J.C., Galzin, R., Gasparini,  
1111 S., Ghiglione, J.-F., Gonzalez, J.-L., Goyet, C., Guidi, L., Guizien, K., Heimbürger, L.-E.,  
1112 Jacquet, S.H.M., Jeffrey, W.H., Joux, F., Le Hir, P., Leblanc, K., Lefèvre, D., Lejeusne, C.,  
1113 Lemé, R., Loÿe-Pilot, M.-D., Mallet, M., Méjanelle, L., Mélin, F., Mellon, C., Mérigot, B.,  
1114 Merle, P.-L., Migon, C., Miller, W.L., Mortier, L., Mostajir, B., Mousseau, L., Moutin, T.,

- 1115 Para, J., Pérez, T., Petrenko, A., Poggiale, J.-C., Prieur, L., Pujo-Pay, M., Pulido-Villena,  
1116 Raimbault, P., Rees, A.P., Ridame, C., Rontani, J.-F., Ruiz Pino, D., Sicre, M.A.,  
1117 Taillandier, V., Tamburini, C., Tanaka, T., Taupier-Letage, I., Tedetti, M., Testor, P.,  
1118 Thébault, H., Thouvenin, B., Touratier, F., Tronczynski, J., Ulses, C., Van Wambeke, F.,  
1119 Vantrepotte, V., Vaz, S., Verney, R., 2011. Marine ecosystems' responses to climatic and  
1120 anthropogenic forcings in the Mediterranean. *Prog. Oceanogr.* 91, 97–166.  
1121 <https://doi.org/10.1016/j.pocean.2011.02.003>
- 1122 European Commission, 2017. Report on the Blue Growth Strategy. Towards more sustainable  
1123 growth and jobs in the blue economy. Commission staff working document. Brussels,  
1124 31.3.2017 SWD (2017) 128 final.
- 1125 European Commission, 2008. Directive 2008/56/EC of the European Parliament and of the  
1126 Council establishing a framework for community action in the field of marine environmental  
1127 policy (Marine Strategy Framework Directive) Off. J. Eur. Union, L164 (2008), pp. 19–40.
- 1128 European Commission, 2003. Proposal for a Council regulation concerning measures for the  
1129 sustainable exploitation of fishery resources in the Mediterranean Sea and amending  
1130 regulations (EC) No 2847/93 and (EC) No 973/2001. Commission of the European  
1131 Communities. Brussels, 9 October 2003, COM (2003) 589 final, 2003/0229 (CNS), 39 pp.
- 1132 FAO, 2018. Impacts of climate change on fisheries and aquaculture. Synthesis of current  
1133 knowledge, adaptation and mitigation options. FAO fisheries and aquaculture technical  
1134 paper 627. FAO, Rome, Italy. 654p.
- 1135 FAO, 2016. Fisheries and aquaculture software. FAO, Fisheries and aquaculture software  
1136 FishStatJ - software for fishery statistical time series. FAO Fisheries and Aquaculture  
1137 Department, Rome (2016). <http://www.fao.org/fishery/>.
- 1138 FAO, 2006. Fisheries and aquaculture software. FishStat Plus - Universal software for fishery  
1139 statistical time series. In: FAO Fisheries and Aquaculture Department [online]. Rome.  
1140 Updated 28 November 2013. [Cited 4 July 2017].  
1141 <http://www.fao.org/fishery/statistics/software/fishstat/en>.
- 1142 Ferrà, C., Tassetti, A.N., Grati, F., Pellini, G., Polidori, P., Scarcella, G., Fabi, G., 2018. Mapping  
1143 change in bottom trawling activity in the Mediterranean Sea through AIS data. *Mar. Policy*  
1144 94, 275–281. <https://doi.org/10.1016/j.marpol.2017.12.013>
- 1145 Fiorentino, F., Massuti, E., Tinti, F., Somarakis, S., Garofalo, G., Russo, T., Facchini, M.T.,  
1146 Carbonara, P., Kipiris, K., Tugores, P., Cannas, R., Tsigenopoulos, C., Patti, B., Colloca,  
1147 F., Sbrana, M., Mifsud, R., Valavanis, V., Spedicato, M.T., 2014. Stock units: Identification  
1148 of distinct biological units (stock units) for different fish and shellfish species and among  
1149 different GFCM-GSA. STOCKMED Deliverable 03: FINAL REPORT (1st and 2nd parts),  
1150 460 pp.
- 1151 Fu, C., Olsen, N., Taylor, N., Grüss, A., Batten, S., Liu, H., Verley, P., Shin, Y.-J., 2017. Spatial  
1152 and temporal dynamics of predator-prey species interactions off western Canada. *ICES J.*  
1153 *Mar. Sci.* 74, 2107–2119. <https://doi.org/10.1093/icesjms/fsx056>
- 1154 Fu, C., Perry, R.I., Shin, Y.-J., Schweigert, J., Liu, H., 2013. An ecosystem modelling framework  
1155 for incorporating climate regime shifts into fisheries management. *Prog. Oceanogr.*, Strait  
1156 of Georgia Ecosystem Research Initiative (ERI) 115, 53–64.  
1157 <https://doi.org/10.1016/j.pocean.2013.03.003>
- 1158 Fulton, E.A., 2010. Approaches to end-to-end ecosystem models. *J. Mar. Syst.*, Contributions from  
1159 Advances in Marine Ecosystem Modelling Research II 23-26 June 2008, Plymouth, UK 81,  
1160 171–183. <https://doi.org/10.1016/j.jmarsys.2009.12.012>
- 1161 Gal, G., Makler-Pick, V., Shachar, N., 2014. Dealing with uncertainty in ecosystem model  
1162 scenarios: Application of the single-model ensemble approach. *Environ. Model. Softw.* 61,  
1163 360–370. <https://doi.org/10.1016/j.envsoft.2014.05.015>
- 1164 GFCM, 2018. GFCM Data Collection Reference Framework (DCRF). Version: 2018.1. 121p.

- 1165 GFCM, 2017a. Working Group on Stock Assessment of Demersal Species (WGSAD). FAO  
1166 headquarters, Rome, Italy, 13–18 November 2017. Final Report. 70p.
- 1167 GFCM, 2017b. Mid-term strategy (2017-2020) towards the sustainability of Mediterranean and  
1168 Black Sea fisheries (Mid-term strategy). FAO-GFCM 2017. Rome.
- 1169 Giannoulaki, M., Belluscio, A., Colloca, F., Frascchetti, S., Scardi, M., Smith, C., Panayotidis, P.,  
1170 Valavanis, V., Spedicato, M.T., 2013a. Mediterranean Sensitive Habitats (2013). Edited by  
1171 Giannoulaki M., A. Belluscio, F. Colloca, S. Frascchetti, M. Scardi, C. Smith, P. Panayotidis,  
1172 V. Valavanis M.T. Spedicato. DG MARE Specific Contract SI2.600741, Final Report, 557  
1173 p.
- 1174 Giannoulaki, M., Iglesias, M., Tugores, M.P., Bonanno, A., Patti, B., Felice, A.D., Leonori, I., Bigot,  
1175 J.L., Tičina, V., Pyrounaki, M.M., Tsagarakis, K., Machias, A., Somarakis, S., Schismenou,  
1176 E., Quinci, E., Basilone, G., Cuttitta, A., Campanella, F., Miquel, J., Oñate, D., Roos, D.,  
1177 Valavanis, V., 2013b. Characterizing the potential habitat of European anchovy *Engraulis*  
1178 *encrasicolus* in the Mediterranean Sea, at different life stages. *Fish. Oceanogr.* 22, 69–89.  
1179 <https://doi.org/10.1111/fog.12005>
- 1180 Giorgi, F., 2006. Climate change hot-spots. *Geophys. Res. Lett.* 33, L08707.  
1181 <https://doi.org/10.1029/2006GL025734>
- 1182 Giorgi, F., Lionello, P., 2008. Climate change projections for the Mediterranean region. *Glob.*  
1183 *Planet. Change, Mediterranean climate: trends, variability and change* 63, 90–104.  
1184 <https://doi.org/10.1016/j.gloplacha.2007.09.005>
- 1185 Grimm, V., Ayllón, D., Railsback, S.F., 2017. Next-Generation Individual-Based Models Integrate  
1186 Biodiversity and Ecosystems: Yes We Can, and Yes We Must. *Ecosystems* 20, 229–236.  
1187 <https://doi.org/10.1007/s10021-016-0071-2>
- 1188 Grüss, A., Schirripa, M.J., Chagaris, D., Drexler, M., Simons, J., Verley, P., Shin, Y.-J.,  
1189 Karnauskas, M., Oliveros-Ramos, R., Ainsworth, C.H., 2015. Evaluation of the trophic  
1190 structure of the West Florida Shelf in the 2000s using the ecosystem model OSMOSE. *J.*  
1191 *Mar. Syst.* 144, 30–47. <https://doi.org/10.1016/j.jmarsys.2014.11.004>
- 1192 Grüss, A., Schirripa, M.J., Chagaris, D., Velez, L., Shin, Y.-J., Verley, P., Oliveros-Ramos, R.,  
1193 Ainsworth, C.H., 2016. Estimating natural mortality rates and simulating fishing scenarios  
1194 for Gulf of Mexico red grouper (*Epinephelus morio*) using the ecosystem model OSMOSE-  
1195 WFS. *J. Mar. Syst.* 154, 264–279. <https://doi.org/10.1016/j.jmarsys.2015.10.014>
- 1196 Gunawardena, J., 2014. Models in biology: ‘accurate descriptions of our pathetic thinking.’ *BMC*  
1197 *Biol.* 12, 29. <https://doi.org/10.1186/1741-7007-12-29>
- 1198 Halouani, G., Ben Rais Lasram, F., Shin, Y.-J., Velez, L., Verley, P., Hattab, T., Oliveros-Ramos,  
1199 R., Diaz, F., Ménard, F., Baklouti, M., Guyennon, A., Romdhane, M.S., Le Loc’h, F., 2016.  
1200 Modelling food web structure using an end-to-end approach in the coastal ecosystem of  
1201 the Gulf of Gabes (Tunisia). *Ecol. Model.* 339, 45–57.  
1202 <https://doi.org/10.1016/j.ecolmodel.2016.08.008>
- 1203 Hattab, T., Albouy, C., Lasram, F.B.R., Somot, S., Le Loc’h, F., Leprieur, F., 2014. Towards a  
1204 better understanding of potential impacts of climate change on marine species distribution:  
1205 a multiscale modelling approach. *Glob. Ecol. Biogeogr.* 23, 1417–1429.  
1206 <https://doi.org/10.1111/geb.12217>
- 1207 Hattab, T., Ben Rais Lasram, F., Albouy, C., Romdhane, M.S., Jarboui, O., Halouani, G., Cury,  
1208 P., Le Loc’h, F., 2013a. An ecosystem model of an exploited southern Mediterranean shelf  
1209 region (Gulf of Gabes, Tunisia) and a comparison with other Mediterranean ecosystem  
1210 model properties. *J. Mar. Syst.* 128, 159–174.  
1211 <https://doi.org/10.1016/j.jmarsys.2013.04.017>
- 1212 Hattab, T., Lasram, F.B.R., Albouy, C., Sammari, C., Romdhane, M.S., Cury, P., Leprieur, F.,  
1213 Loc’h, F.L., 2013b. The Use of a Predictive Habitat Model and a Fuzzy Logic Approach for  
1214 Marine Management and Planning. *PLOS ONE* 8, e76430.  
1215 <https://doi.org/10.1371/journal.pone.0076430>

- 1216 Herrmann, M.J., Somot, S., 2008. Relevance of ERA40 dynamical downscaling for modeling deep  
1217 convection in the Mediterranean Sea. *Geophys. Res. Lett.* 35, L04607.  
1218 <https://doi.org/10.1029/2007GL032442>
- 1219 Hilborn, R., 2011. Future directions in ecosystem based fisheries management: A personal  
1220 perspective. *Fish. Res.* 108, 235–239. <https://doi.org/10.1016/j.fishres.2010.12.030>
- 1221 Hill, S.L., Watters, G.M., Punt, A.E., McAllister, M.K., Quéré, C.L., Turner, J., 2007. Model  
1222 uncertainty in the ecosystem approach to fisheries. *Fish Fish.* 8, 315–336.  
1223 <https://doi.org/10.1111/j.1467-2979.2007.00257.x>
- 1224 Hoegh-Guldberg, O., Cai, R., Poloczanska, E.S., Brewer, P., Sundby, S., Hilmi, K., Fabry, V.J.,  
1225 Jung, S., 2014. The Ocean – Chapter 30. In: *Climate Change 2014: Impacts, Adaptation,  
1226 and Vulnerability. Part B: Regional Aspects. Contribution of Working Group II to the Fifth  
1227 Assessment Report of the Intergovernmental Panel on Climate Change [Barros, V.R., C.B.  
1228 Field, D.J. Dokken, M.D. Mastrandrea, K.J. Mach, T.E. Bilir, M. Chatterjee, K.L. Ebi, Y.O.  
1229 Estrada, R.C. Genova, B. Girma, E.S. Kissel, A.N. Levy, S. MacCracken, P.R.  
1230 Mastrandrea, and L.L. White (eds.)]. Cambridge University Press, Cambridge, United  
1231 Kingdom and New York, NY, USA, pp. 1655-1731.*
- 1232 Hyder, K., Rossberg, A.G., Allen, J.I., Austen, M.C., Barciela, R.M., Bannister, H.J., Blackwell,  
1233 P.G., Blanchard, J.L., Burrows, M.T., Defriez, E., Dorrington, T., Edwards, K.P., Garcia-  
1234 Carreras, B., Heath, M.R., Hembury, D.J., Heymans, J.J., Holt, J., Houle, J.E., Jennings,  
1235 S., Mackinson, S., Malcolm, S.J., McPike, R., Mee, L., Mills, D.K., Montgomery, C.,  
1236 Pearson, D., Pinnegar, J.K., Pollicino, M., Popova, E.E., Rae, L., Rogers, S.I., Speirs, D.,  
1237 Spence, M.A., Thorpe, R., Turner, R.K., van der Molen, J., Yool, A., Paterson, D.M., 2015.  
1238 Making modelling count - increasing the contribution of shelf-seas community and  
1239 ecosystem models to policy development and management. *Mar. Policy* 61, 291–302.  
1240 <https://doi.org/10.1016/j.marpol.2015.07.015>
- 1241 Ignatiades, L., Gotsis-Skretas, O., Pagou, K., Krasakopoulou, E., 2009. Diversification of  
1242 phytoplankton community structure and related parameters along a large-scale  
1243 longitudinal east–west transect of the Mediterranean Sea. *J. Plankton Res.* 31, 411–428.  
1244 <https://doi.org/10.1093/plankt/fbn124>
- 1245 Jackson, J.M., Lenz, P.H., 2016. Predator-prey interactions in the plankton: larval fish feeding on  
1246 evasive copepods. *Sci. Rep.* 6, 33585. <https://doi.org/10.1038/srep33585>
- 1247 Jochum, M., Schneider, F.D., Crowe, T.P., Brose, U., O’Gorman, E.J., 2012. Climate-induced  
1248 changes in bottom-up and top-down processes independently alter a marine ecosystem.  
1249 *Philos. Trans. R. Soc. B Biol. Sci.* 367, 2962–2970. <https://doi.org/10.1098/rstb.2012.0237>
- 1250 Jönsson, A.M., Anderbrant, O., Holmér, J., Johansson, J., Schurgers, G., Svensson, G.P., Smith,  
1251 H.G., 2015. Enhanced science–stakeholder communication to improve ecosystem model  
1252 performances for climate change impact assessments. *Ambio* 44, 249–255.  
1253 <https://doi.org/10.1007/s13280-014-0553-4>
- 1254 Jordà, G., Marbà, N., Duarte, C.M., 2012. Mediterranean seagrass vulnerable to regional climate  
1255 warming. *Nat. Clim. Change* 2, 821–824. <https://doi.org/10.1038/nclimate1533>
- 1256 Jørgensen, C., Enberg, K., Dunlop, E.S., Arlinghaus, R., Boukal, D.S., Brander, K., Ernande, B.,  
1257 Gårdmark, A.G., Johnston, F., Matsumura, S., Pardoe, H., Raab, K., Silva, A., Vainikka,  
1258 A., Dieckmann, U., Heino, M., Rijnsdorp, A.D., 2007. Ecology: Managing Evolving Fish  
1259 Stocks. *Science* 318, 1247–1248. <https://doi.org/10.1126/science.1148089>
- 1260 Karachle, P.K., Stergiou, K.I., 2017. An update on the feeding habits of fish in the Mediterranean  
1261 Sea (2002-2015). *Mediterr. Mar. Sci.* 18, 43–52. <https://doi.org/10.12681/mms.1968>
- 1262 Katsanevakis, S., Bogucarskis, K., Gatto, F., Vandekerckhove, J., Deriu, I., Cardoso, A.C., 2012.  
1263 Building the European Alien Species Information Network (EASIN): a novel approach for  
1264 the exploration of distributed alien species data. *BiolInvasions Rec.* 1, 235–245.  
1265 <https://doi.org/10.3391/bir.2012.1.4.01>

- 1266 Katsanevakis, S., Levin, N., Coll, M., Giakoumi, S., Shkedi, D., Mackelworth, P., Levy, R.,  
1267 Velegrakis, A., Koutsoubas, D., Caric, H., Brokovich, E., Öztürk, B., Kark, S., 2015. Marine  
1268 conservation challenges in an era of economic crisis and geopolitical instability: The case  
1269 of the Mediterranean Sea. *Mar. Policy* 51, 31–39.  
1270 <https://doi.org/10.1016/j.marpol.2014.07.013>
- 1271 Katsanevakis, S., Wallentinus, I., Zenetos, A., Leppäkoski, E., Çinar, M.E., Oztürk, B., Grabowski,  
1272 M., Golani, D., Cardoso, A.C., 2014. Impacts of invasive alien marine species on  
1273 ecosystem services and biodiversity: a pan-European review. *Aquat. Invasions* 9, 391–  
1274 423. <https://doi.org/10.3391/ai.2014.9.4.01>
- 1275 Kessouri, F., 2015. Cycles biogéochimiques de la mer Méditerranée : processus et bilans, PhD  
1276 thesis, Univ. Toulouse III Paul Sabatier, Toulouse, France.
- 1277 Kessouri, F., Ulses, C., Estournel, C., Marsaleix, P., Severin, T., Pujo-Pay, M., Caparros, J.,  
1278 Raimbault, P., Pasqueron de Fommervault, O., D’Ortenzio, F., Taillandier, V., Testor, P.,  
1279 Conan, P., 2017. Nitrogen and Phosphorus Budgets in the Northwestern Mediterranean  
1280 Deep Convection Region. *J. Geophys. Res. Oceans* 122, 9429–9454.  
1281 <https://doi.org/10.1002/2016JC012665>
- 1282 Kroodsmas, D.A., Mayorga, J., Hochberg, T., Miller, N.A., Boerder, K., Ferretti, F., Wilson, A.,  
1283 Bergman, B., White, T.D., Block, B.A., Woods, P., Sullivan, B., Costello, C., Worm, B.,  
1284 2018. Tracking the global footprint of fisheries. *Science* 359, 904–908.  
1285 <https://doi.org/10.1126/science.aao5646>
- 1286 Law, R., 2000. Fishing, selection, and phenotypic evolution. *ICES J. Mar. Sci.* 57, 659–668.  
1287 <https://doi.org/10.1006/jmsc.2000.0731>
- 1288 Le Quesne, W., Brown, M., De oliveira, J., Casey, J., O’Brien, C., 2013. Data-deficient fisheries in  
1289 EU waters. Directorate-General for internal policies. Policy department B: Structural ad  
1290 cohesion policies. IP/B/PECH/IC/2012-118. PE 495.865. June 2013. 74p.
- 1291 Lehuta, S., Girardin, R., Mahévas, S., Travers-Trolet, M., Vermard, Y., 2016. Reconciling complex  
1292 system models and fisheries advice: Practical examples and leads. *Aquat. Living Resour.*  
1293 29, 208. <https://doi.org/10.1051/alr/2016022>
- 1294 Lehuta, S., Mahévas, S., Petitgas, P., Pelletier, D., 2010. Combining sensitivity and uncertainty  
1295 analysis to evaluate the impact of management measures with ISIS–Fish: marine  
1296 protected areas for the Bay of Biscay anchovy (*Engraulis encrasicolus*) fishery. *ICES J.*  
1297 *Mar. Sci.* 67, 1063–1075. <https://doi.org/10.1093/icesjms/fsq002>
- 1298 Lejeusne, C., Chevaldonné, P., Pergent-Martini, C., Boudouresque, C.F., Pérez, T., 2010. Climate  
1299 change effects on a miniature ocean: the highly diverse, highly impacted Mediterranean  
1300 Sea. *Trends Ecol. Evol.* 25, 250–260. <https://doi.org/10.1016/j.tree.2009.10.009>
- 1301 Leleu, K., Pelletier, D., Charbonnel, E., Letourneur, Y., Alban, F., Bachet, F., Boudouresque, C.F.,  
1302 2014. Métiers, effort and catches of a Mediterranean small-scale coastal fishery: The case  
1303 of the Côte Bleue Marine Park. *Fish. Res.* 154, 93–101.  
1304 <https://doi.org/10.1016/j.fishres.2014.02.006>
- 1305 Ligas, A., Sartor, P., Colloca, F., 2011. Trends in population dynamics and fishery of *Parapenaeus*  
1306 *longirostris* and *Nephrops norvegicus* in the Tyrrhenian Sea (NW Mediterranean): the  
1307 relative importance of fishery and environmental variables. *Mar. Ecol.* 32, 25–35.  
1308 <https://doi.org/10.1111/j.1439-0485.2011.00440.x>
- 1309 Link, J., 2010. *Ecosystem-Based Fisheries Management: Confronting Tradeoffs*. Cambridge  
1310 University Press.
- 1311 Liqueste, C., Piroddi, C., Macías, D., Druon, J.-N., Zulian, G., 2016. Ecosystem services  
1312 sustainability in the Mediterranean Sea: assessment of status and trends using multiple  
1313 modelling approaches. *Sci. Rep.* 6. <https://doi.org/10.1038/srep34162>
- 1314 Lotze, H.K., Lenihan, H.S., Bourque, B.J., Bradbury, R.H., Cooke, R.G., Kay, M.C., Kidwell, S.M.,  
1315 Kirby, M.X., Peterson, C.H., Jackson, J.B.C., 2006. Depletion, Degradation, and Recovery

- 1316 Potential of Estuaries and Coastal Seas. *Science* 312, 1806–1809.  
1317 <https://doi.org/10.1126/science.1128035>
- 1318 MacCall, A.D., 1990. Dynamic geography of marine fish populations, Books in recruitment fishery  
1319 oceanography. Washington Sea Grant Program: Distributed by University of Washington  
1320 Press, Seattle.
- 1321 Macias, D., Garcia-Gorriz, E., Piroddi, C., Stips, A., 2014. Biogeochemical control of marine  
1322 productivity in the Mediterranean Sea during the last 50 years. *Glob. Biogeochem. Cycles*  
1323 28, 897–907. <https://doi.org/10.1002/2014GB004846>
- 1324 Macias, D.M., Garcia-Gorriz, E., Stips, A., 2015. Productivity changes in the Mediterranean Sea  
1325 for the twenty-first century in response to changes in the regional atmospheric forcing.  
1326 *Front. Mar. Sci.* 2. <https://doi.org/10.3389/fmars.2015.00079>
- 1327 Macpherson, E., 1998. Ontogenetic shifts in habitat use and aggregation in juvenile sparid fishes.  
1328 *J. Exp. Mar. Biol. Ecol.* 220, 127–150. [https://doi.org/10.1016/S0022-0981\(97\)00086-5](https://doi.org/10.1016/S0022-0981(97)00086-5)
- 1329 Macpherson, E., Duarte, C.M., 1991. Bathymetric trends in demersal fish size: is there a general  
1330 relationship? *Mar. Ecol. Prog. Ser.* 71, 103–112.
- 1331 Marbà, N., Jorda, G., Agusti, S., Girard, C., Duarte, C.M., 2015. Footprints of climate change on  
1332 Mediterranean Sea biota. *Front. Mar. Sci.* 2. <https://doi.org/10.3389/fmars.2015.00056>
- 1333 Marzloff, M., Shin, Y.-J., Tam, J., Travers, M., Bertrand, A., 2009. Trophic structure of the Peruvian  
1334 marine ecosystem in 2000–2006: Insights on the effects of management scenarios for the  
1335 hake fishery using the IBM trophic model Osmose. *J. Mar. Syst.* 75, 290–304.  
1336 <https://doi.org/10.1016/j.jmarsys.2008.10.009>
- 1337 Maynou, F., Recasens, L., Lombarte, A., 2011. Fishing tactics dynamics of a Mediterranean small-  
1338 scale coastal fishery. *Aquat. Living Resour.* 24, 149–159.  
1339 <https://doi.org/10.1051/alr/2011131>
- 1340 Methratta, E.T., Link, J.S., 2007. Ontogenetic variation in habitat associations for four flatfish  
1341 species in the Gulf of Maine-Georges Bank region. *J. Fish Biol.* 70, 1669–1688.  
1342 <https://doi.org/10.1111/j.1095-8649.2007.01428.x>
- 1343 Micheli, F., Halpern, B.S., Walbridge, S., Ciriaco, S., Ferretti, F., Fraschetti, S., Lewison, R.,  
1344 Nykjaer, L., Rosenberg, A.A., 2013a. Cumulative Human Impacts on Mediterranean and  
1345 Black Sea Marine Ecosystems: Assessing Current Pressures and Opportunities. *PLOS*  
1346 *ONE* 8, e79889. <https://doi.org/10.1371/journal.pone.0079889>
- 1347 Micheli, F., Levin, N., Giakoumi, S., Katsanevakis, S., Abdulla, A., Coll, M., Fraschetti, S., Kark,  
1348 S., Koutsoubas, D., Mackelworth, P., others, 2013b. Setting priorities for regional  
1349 conservation planning in the Mediterranean Sea. *PLoS One* 8, e59038.
- 1350 Morote, E., Olivar, M.P., Villate, F., Uriarte, I., 2010. A comparison of anchovy (*Engraulis*  
1351 *encrasicolus*) and sardine (*Sardina pilchardus*) larvae feeding in the Northwest  
1352 Mediterranean: influence of prey availability and ontogeny. *ICES J. Mar. Sci.* 67, 897–908.  
1353 <https://doi.org/10.1093/icesjms/fsp302>
- 1354 Mouillot, D., Albouy, C., Guilhaumon, F., Ben Rais Lasram, F., Coll, M., Devictor, V., Meynard,  
1355 C.N., Pauly, D., Tomasini, J.A., Troussellier, M., Velez, L., Watson, R., Douzery, E.J.P.,  
1356 Mouquet, N., 2011. Protected and Threatened Components of Fish Biodiversity in the  
1357 Mediterranean Sea. *Curr. Biol.* 21, 1044–1050. <https://doi.org/10.1016/j.cub.2011.05.005>
- 1358 Moullec, F., Benedetti, F., Saraux, C., Van Beveren, E., Shin, Y.-J., 2016. Climate change induces  
1359 bottom-up changes in the food webs of the Mediterranean Sea. In: Thiébaud S., Moatti  
1360 J.P. (eds.). *The Mediterranean region under climate change – A scientific update*. Allenvi  
1361 / IRD Editions, Marseille. pp: 219-228.
- 1362 Moutopoulos, D.K., Koutsikopoulos, C., 2014. Fishing strange data in national fisheries statistics  
1363 of Greece. *Mar. Policy* 48, 114–122. <https://doi.org/10.1016/j.marpol.2014.03.017>
- 1364 Nicholson, E., Fulton, E.A., Brooks, T.M., Blanchard, R., Leadley, P., Metzger, J.P., Mokany, K.,  
1365 Stevenson, S., Wintle, B.A., Woolley, S.N.C., Barnes, M., Watson, J.E.M., Ferrier, S.,



- 1366 2018. Scenarios and Models to Support Global Conservation Targets. *Trends Ecol. Evol.*  
1367 <https://doi.org/10.1016/j.tree.2018.10.006>
- 1368 Oliveros Ramos, R., 2014. End-to-end modelling for an ecosystem approach to fisheries in the  
1369 Northern Humboldt Current Ecosystem. *Inst. MAR PERU - IMARPE*.
- 1370 Oliveros-Ramos, R., Shin, Y.-J., 2016. Calibrar: an R package for fitting complex ecological  
1371 models. *ArXiv160303141 Math Q-Bio Stat*.
- 1372 Oliveros-Ramos, R., Verley, P., Echevin, V., Shin, Y.-J., 2017. A sequential approach to calibrate  
1373 ecosystem models with multiple time series data. *Prog. Oceanogr.* 151, 227–244.  
1374 <https://doi.org/10.1016/j.pocean.2017.01.002>
- 1375 Ortega-Cisneros, K., Cochrane, K., Fulton, E.A., 2017. An Atlantis model of the southern Benguela  
1376 upwelling system: Validation, sensitivity analysis and insights into ecosystem functioning.  
1377 *Ecol. Model.* 355, 49–63. <https://doi.org/10.1016/j.ecolmodel.2017.04.009>
- 1378 Pauly, D., Ulman, A., Piroddi, C., Bultel, E., Coll, M., 2014. ‘Reported’ versus ‘likely’ fisheries  
1379 catches of four Mediterranean countries. *Sci. Mar.* 78, 11–17.  
1380 <https://doi.org/10.3989/scimar.04020.17A>
- 1381 Pauly, D., Zeller, D., 2016. Catch reconstructions reveal that global marine fisheries catches are  
1382 higher than reported and declining. *Nat. Commun.* 7, 10244.  
1383 <https://doi.org/10.1038/ncomms10244>
- 1384 Payne, M.R., Barange, M., Cheung, W.W.L., MacKenzie, B.R., Batchelder, H.P., Cormon, X.,  
1385 Eddy, T.D., Fernandes, J.A., Hollowed, A.B., Jones, M.C., Link, J.S., Neubauer, P., Ortiz,  
1386 I., Queirós, A.M., Paula, J.R., 2016. Uncertainties in projecting climate-change impacts in  
1387 marine ecosystems. *ICES J. Mar. Sci.* 73, 1272–1282.  
1388 <https://doi.org/10.1093/icesjms/fsv231>
- 1389 Pecl, G.T., Araújo, M.B., Bell, J.D., Blanchard, J., Bonebrake, T.C., Chen, I.-C., Clark, T.D.,  
1390 Colwell, R.K., Danielsen, F., Evengård, B., Falconi, L., Ferrier, S., Frusher, S., Garcia,  
1391 R.A., Griffis, R.B., Hobday, A.J., Janion-Scheepers, C., Jarzyna, M.A., Jennings, S.,  
1392 Lenoir, J., Linnetved, H.I., Martin, V.Y., McCormack, P.C., McDonald, J., Mitchell, N.J.,  
1393 Mustonen, T., Pandolfi, J.M., Pettorelli, N., Popova, E., Robinson, S.A., Scheffers, B.R.,  
1394 Shaw, J.D., Sorte, C.J.B., Strugnell, J.M., Sunday, J.M., Tuanmu, M.-N., Vergés, A.,  
1395 Villanueva, C., Wernberg, T., Wapstra, E., Williams, S.E., 2017. Biodiversity redistribution  
1396 under climate change: Impacts on ecosystems and human well-being. *Science* 355,  
1397 eaai9214. <https://doi.org/10.1126/science.aai9214>
- 1398 Pepin, P., Penney, R., 2000. Feeding by a larval fish community: impact on zooplankton. *Mar.*  
1399 *Ecol. Prog. Ser.* 204, 199–212. <https://doi.org/10.3354/meps204199>
- 1400 Peristeraki, P., Tserpes, G., Lefkaditou, E., 2005. What cephalopod remains from *Xiphias gladius*  
1401 stomachs can imply about predator-prey interactions in the Mediterranean Sea? *J. Fish*  
1402 *Biol.* 67, 549–554. <https://doi.org/10.1111/j.0022-1112.2005.00742.x>
- 1403 Pikitch, E.K., Santora, C., Babcock, E.A., Bakun, A., Bonfil, R., Conover, D.O., Dayton, P.,  
1404 Doukakis, P., Fluharty, D., Heneman, B., Houde, E.D., Link, J., Livingston, P.A., Mangel,  
1405 M., McAllister, M.K., Pope, J., Sainsbury, K.J., 2004. Ecosystem-Based Fishery  
1406 Management. *Science* 305, 346–347. <https://doi.org/10.1126/science.1098222>
- 1407 Piroddi, C., Coll, M., Liqueste, C., Macias, D., Greer, K., Buszowski, J., Steenbeek, J., Danovaro,  
1408 R., Christensen, V., 2017. Historical changes of the Mediterranean Sea ecosystem:  
1409 modelling the role and impact of primary productivity and fisheries changes over time. *Sci.*  
1410 *Rep.* 7, 44491. <https://doi.org/10.1038/srep44491>
- 1411 Piroddi, C., Coll, M., Steenbeek, J., Macias Moy, D., Christensen, V., 2015a. Modelling the  
1412 Mediterranean marine ecosystem as a whole: addressing the challenge of complexity. *Mar.*  
1413 *Ecol. Prog. Ser.* 533, 47–65. <https://doi.org/10.3354/meps11387>
- 1414 Piroddi, C., Teixeira, H., Lynam, C.P., Smith, C., Alvarez, M.C., Mazik, K., Andonegi, E., Churilova,  
1415 T., Tedesco, L., Chifflet, M., Chust, G., Galparsoro, I., Garcia, A.C., Kämäri, M., Kryvenko,  
1416 O., Lassalle, G., Neville, S., Niquil, N., Papadopoulou, N., Rossberg, A.G., Suslin, V.,

- 1417 Uyarra, M.C., 2015b. Using ecological models to assess ecosystem status in support of  
1418 the European Marine Strategy Framework Directive. *Ecol. Indic.* 58, 175–191.  
1419 <https://doi.org/10.1016/j.ecolind.2015.05.037>
- 1420 Por, D., 1989. The legacy of Tethys. Kluwer Academic Publishers, Dordrecht, p 41–64.
- 1421 Ragonese, S., Cannizaro, G., Norrito, P., Jereb, P., 2016. Watch your stock! A warning about the  
1422 endorsement of the “Stock concept” adopted by the STOCKMED project for the  
1423 Mediterranean groundfish fisheries. NTR-ITPP, sr72: 20 pp.
- 1424 Raick, C., Delhez, E.J.M., Soetaert, K., Grégoire, M., 2005. Study of the seasonal cycle of the  
1425 biogeochemical processes in the Ligurian Sea using a 1D interdisciplinary model. *J. Mar.*  
1426 *Syst.* 55, 177–203. <https://doi.org/10.1016/j.jmarsys.2004.09.005>
- 1427 Ramírez, F., Coll, M., Navarro, J., Bustamante, J., Green, A.J., 2018. Spatial congruence between  
1428 multiple stressors in the Mediterranean Sea may reduce its resilience to climate impacts.  
1429 *Sci. Rep.* 8, 14871. <https://doi.org/10.1038/s41598-018-33237-w>
- 1430 Roberts, S.M., 2003. Examination of the stomach contents from a Mediterranean sperm whale  
1431 found south of Crete, Greece. *J. Mar. Biol. Assoc. U. K.* 83, 667–670.  
1432 <https://doi.org/10.1017/S0025315403007628h>
- 1433 Rose, K.A., Allen, J.I., Artioli, Y., Barange, M., Blackford, J., Carlotti, F., Cropp, R., Daewel, U.,  
1434 Edwards, K., Flynn, K., Hill, S.L., HilleRisLambers, R., Huse, G., Mackinson, S., Megrey,  
1435 B., Moll, A., Rivkin, R., Salihoglu, B., Schrum, C., Shannon, L., Shin, Y.-J., Smith, S.L.,  
1436 Smith, C., Solidoro, C., St. John, M., Zhou, M., 2010. End-To-End Models for the Analysis  
1437 of Marine Ecosystems: Challenges, Issues, and Next Steps. *Mar. Coast. Fish.* 2, 115–130.  
1438 <https://doi.org/10.1577/C09-059.1>
- 1439 Sabatés, A., Martín, P., Lloret, J., Raya, V., 2006. Sea warming and fish distribution: the case of  
1440 the small pelagic fish, *Sardinella aurita*, in the western Mediterranean. *Glob. Change Biol.*  
1441 12, 2209–2219. <https://doi.org/10.1111/j.1365-2486.2006.01246.x>
- 1442 Sbrana, M., Zupa, W., Ligas, A., Capezzuto, F., Chatzisprou, A., Follesa, M.C., Gancitano, V.,  
1443 Guijarro, B., Isajlović, I., Jadaud, A., Markovic, O., Micallef, R., Peristeraki, P., Piccinetti,  
1444 C., Thasitis, I., Carbonara, P., in press. Spatial-temporal abundance pattern of deep-water  
1445 rose shrimp, *Parapenaeus longirostris*, and Norway lobster, *Nephrops norvegicus*, in  
1446 European Mediterranean waters. *Sci. Mar.*
- 1447 Sharir, Y., Kerem, D., Gol'din, P., Spanier, E., 2011. Small size in the common bottlenose dolphin  
1448 *-Tursiops truncatus* in the eastern Mediterranean: a possible case of Levantine nanism.  
1449 *Mar. Ecol. Prog. Ser.* 438, 241–251. <https://doi.org/10.3354/meps09282>
- 1450 Shin, Y.-J., Cury, P., 2004. Using an individual-based model of fish assemblages to study the  
1451 response of size spectra to changes in fishing. *Can. J. Fish. Aquat. Sci.* 61, 414–431.  
1452 <https://doi.org/10.1139/f03-154>
- 1453 Shin, Y.-J., Cury, P., 2001. Exploring fish community dynamics through size-dependent trophic  
1454 interactions using a spatialized individual-based model. *Aquat. Living Resour.* 14, 65–80.  
1455 [https://doi.org/10.1016/S0990-7440\(01\)01106-8](https://doi.org/10.1016/S0990-7440(01)01106-8)
- 1456 Shin, Y.-J., Rochet, M.-J., Jennings, S., Field, J.G., Gislason, H., 2005. Using size-based  
1457 indicators to evaluate the ecosystem effects of fishing. *ICES J. Mar. Sci.* 62, 384–396.  
1458 <https://doi.org/10.1016/j.icesjms.2005.01.004>
- 1459 Shin, Y.-J., Shannon, L.J., Cury, P.M., 2004. Simulations of fishing effects on the southern  
1460 Benguela fish community using an individual-based model: learning from a comparison  
1461 with ECOSIM. *Afr. J. Mar. Sci.* 26, 95–114. <https://doi.org/10.2989/18142320409504052>
- 1462 Sonin, O., Spanier, E., Levi, D., Patti, B., Rizzo, P., Andreoli, M.G., 2007. Nanism (dwarfism) in  
1463 fish: a comparison between red mullet *Mullus barbatus* from the southeastern and the  
1464 central Mediterranean. *Mar. Ecol. Prog. Ser.* 343, 221–228.  
1465 <https://doi.org/10.3354/meps06917>

- 1466 STECF, 2017. Reports of the Scientific, Technical and Economic Committee for Fisheries  
1467 (STECF)-56th Plenary meeting Report (PLEN-17-03). 2017. Publications office of the  
1468 European union, Luxembourg, ISSN 1831-9424, 162 pp.
- 1469 Stergiou, K.I., Karpouzi, V.S., 2002. Feeding habits and trophic levels of Mediterranean fish. *Rev.*  
1470 *Fish Biol. Fish.* 11, 217–254. <https://doi.org/10.1023/A:1020556722822>
- 1471 Stergiou, K.I., Somarakis, S., Triantafyllou, G., Tsiaras, K.P., Giannoulaki, M., Petihakis, G.,  
1472 Machias, A., Tsikliras, A.C., 2016. Trends in productivity and biomass yields in the  
1473 Mediterranean Sea Large Marine Ecosystem during climate change. *Environ. Dev.*,  
1474 Thematic Issue - Ecosystem Based Management of Large Marine Ecosystems 17, 57–74.  
1475 <https://doi.org/10.1016/j.envdev.2015.09.001>
- 1476 Stock, A., Crowder, L.B., Halpern, B.S., Micheli, F., 2018. Uncertainty analysis and robust areas  
1477 of high and low modeled human impact on the global oceans. *Conserv. Biol.* 0.  
1478 <https://doi.org/10.1111/cobi.13141>
- 1479 Thuiller, W., Lafourcade, B., Engler, R., Araújo, M.B., 2009. BIOMOD – a platform for ensemble  
1480 forecasting of species distributions. *Ecography* 32, 369–373.  
1481 <https://doi.org/10.1111/j.1600-0587.2008.05742.x>
- 1482 Travers, M., Shin, Y.-J., Jennings, S., Cury, P., 2007. Towards end-to-end models for investigating  
1483 the effects of climate and fishing in marine ecosystems. *Prog. Oceanogr.* 75, 751–770.  
1484 <https://doi.org/10.1016/j.pocean.2007.08.001>
- 1485 Travers, M., Shin, Y.-J., Jennings, S., Machu, E., Huggett, J.A., Field, J.G., Cury, P.M., 2009. Two-  
1486 way coupling versus one-way forcing of plankton and fish models to predict ecosystem  
1487 changes in the Benguela. *Ecol. Model.*, Selected Papers from the Sixth European  
1488 Conference on Ecological Modelling - ECEM '07, on Challenges for ecological modelling  
1489 in a changing world: Global Changes, Sustainability and Ecosystem Based Management,  
1490 November 27-30, 2007, Trieste, Italy 220, 3089–3099.  
1491 <https://doi.org/10.1016/j.ecolmodel.2009.08.016>
- 1492 Travers-Trolet, M., Shin, Y.-J., Field, J.G., 2014. An end-to-end coupled model ROMS-  
1493 N2P2Z2D2-OSMOSE of the southern Benguela foodweb: parameterisation, calibration  
1494 and pattern-oriented validation. *Afr. J. Mar. Sci.* 36, 11–29.  
1495 <https://doi.org/10.2989/1814232X.2014.883326>
- 1496 Tsikliras, A.C., Dinouli, A., Tsiros, V.-Z., Tsalkou, E., 2015. The Mediterranean and Black Sea  
1497 Fisheries at Risk from Overexploitation. *PLOS ONE* 10, e0121188.  
1498 <https://doi.org/10.1371/journal.pone.0121188>
- 1499 Tzanatos, E., Raitzos, D.E., Triantafyllou, G., Somarakis, S., Tsonis, A.A., 2014. Indications of a  
1500 climate effect on Mediterranean fisheries. *Clim. Change* 122, 41–54.  
1501 <https://doi.org/10.1007/s10584-013-0972-4>
- 1502 Ulses, C., Auger, P.-A., Soetaert, K., Marsaleix, P., Diaz, F., Coppola, L., Herrmann, M.J.,  
1503 Kessouri, F., Estournel, C., 2016. Budget of organic carbon in the North-Western  
1504 Mediterranean open sea over the period 2004–2008 using 3-D coupled physical-  
1505 biogeochemical modeling. *J. Geophys. Res. Oceans* 121, 7026–7055.  
1506 <https://doi.org/10.1002/2016JC011818>
- 1507 Vasilakopoulos, P., Maravelias, C.D., Tserpes, G., 2014. The Alarming Decline of Mediterranean  
1508 Fish Stocks. *Curr. Biol.* 24, 1643–1648. <https://doi.org/10.1016/j.cub.2014.05.070>
- 1509 Velasco, F., Olaso, I., 1998. European hake *Merluccius merluccius* (L., 1758) feeding in the  
1510 Cantabrian Sea: seasonal, bathymetric and length variations. *Fish. Res.* 38, 33–44.  
1511 [https://doi.org/10.1016/S0165-7836\(98\)00111-8](https://doi.org/10.1016/S0165-7836(98)00111-8)
- 1512 Whitehead, P., Bauchot, L., Hureau, J., Nielsen, J., Tortonese, E., 1986. Fishes of the North-  
1513 Eastern Atlantic and the Mediterranean, Vols. 1–3. UNESCO, Paris.
- 1514 Würtz, M., 2012. Mediterranean submarine canyons: ecology and governance. Gland, Switzerland  
1515 and Malaga. Spain: IUCN. 216p. IUCN.

- 1516 Xing, L., Zhang, C., Chen, Y., Shin, Y.-J., Verley, P., Yu, H., Ren, Y., 2017. An individual-based  
1517 model for simulating the ecosystem dynamics of Jiaozhou Bay, China. *Ecol. Model.* 360,  
1518 120–131. <https://doi.org/10.1016/j.ecolmodel.2017.06.010>
- 1519 Zeller, D., Pauly, D., 2015. Reconstructing marine fisheries catch data. In: D. Pauly and D. Zeller  
1520 (eds). *Catch reconstruction: concepts, methods and data sources*. Online Publication. *Sea*  
1521 *Around Us* ([www.seaaroundus.org](http://www.seaaroundus.org)). University of British Columbia.  
1522
